# **The *Drosophila* Neurogenin, Tap, controls axonal growth through the Wnt adaptor protein Dishevelled**

Liqun Yuan<sup>1,2,3\*</sup>, Shu Hu<sup>1,2,3,4\*</sup>, Zeynep Okray<sup>1,2,3</sup>, Xi Ren<sup>5</sup>, Natalie De Geest<sup>1,2</sup>, Annelies Claeys<sup>1,2</sup>, Jiekun Yan<sup>1,2</sup>, Eric Bellefroid<sup>5</sup>, Bassem A. Hassan<sup>1,2,3§</sup>, Xiao-Jiang Quan<sup>1,2§</sup>

<sup>1</sup>VIB Center for the Biology of Disease, VIB, 3000 Leuven, Belgium

<sup>2</sup>Center for Human Genetics, University of Leuven School of Medicine, 3000 Leuven, Belgium

<sup>3</sup>Program in Molecular and Developmental Genetics, Doctoral School for Biomedical Sciences, University of Leuven School of Medicine, 3000 Leuven, Belgium

<sup>4</sup>Medical College, Henan University of Science and Technology, 471003 Luoyang, Henan Province, China

<sup>5</sup>Laboratoire de Génétique du Développement, Université Libre de Bruxelles, Institut de Biologie et de Médecine Moléculaires (IBMM), 6041 Gosselies, Belgium.

\*These authors contributed equally to this work

§Corresponding author

Corresponding author's email addresses:

B.A.H: [bh@kuleuven.be](mailto:bh@kuleuven.be)

X.Q.: [xiao-jiang.quan@cme.vib-kuleuven.be](mailto:xiao-jiang.quan@cme.vib-kuleuven.be)

## Summary

The *Drosophila* Neurogenin homologue, Target of Pox neuro (Tap), prevents axonal overgrowth by regulating the Wnt Planar Cell Polarity pathway adaptor protein Dishevelled.

## Abstract

The Neurogenin (Ngn) transcription factors control early neurogenesis and neurite outgrowth in mammalian cortex. In contrast to their proneural activity, their function in neurite growth is poorly understood. *Drosophila* has a single predicted Ngn homologue called Tap, whose function is completely unknown. Here we show that Tap is not a proneural protein in *Drosophila* but is required for proper axonal growth and guidance of neurons of the mushroom body (MB), a neuropile required for associative learning and memory. Genetic and expression analyses suggest that Tap inhibits excessive axonal growth by fine regulation of the levels of the Wnt signaling adaptor protein, Dishevelled.

## Keywords

Neurogenin; axonal growth; mushroom body; Wnt signaling

## Introduction

Proper function of the nervous system is based on the production of a diversity of neuronal and glial cells, as well as the precise targeting of their axons and dendrites. A key transcription factor (TF) family, which controls the commitment of neuronal cell fate and neurite guidance, is the Neurogenin (Ngn) family. Ngn proteins belong to a structurally and functionally conserved basic helix-loop-helix (bHLH) superfamily. Ngns in vertebrates are sufficient to initiate the neuronal cell fate in the central nervous system (CNS) (reviewed in Bertrand et al., 2002; Ma et al., 1998). In contrast, very little is known about the function of Ngn proteins in invertebrate systems. Gain of function of analyses in *Drosophila* and vertebrate models suggested that during evolution a switch in proneural activity occurred between the Ngns and a highly related family of bHLH TFs called the Atonal family. Specifically, whereas Ngns are necessary and sufficient for the induction of neurogenesis in vertebrates, they cannot do so in flies. Conversely, in flies Atonal type proteins can induce

55 neurogenesis, but fail to do so in vertebrates (Quan et al., 2004). A crucial test of this  
56 “evolutionary proneural switch hypothesis” is whether or not *Drosophila* Neurogenins  
57 act as proneural genes in flies and vertebrates.

58

59 In addition to their proneural function, Ngns play various critical roles in the  
60 development of vertebrate nervous system, including regulating the outgrowth and  
61 targeting of both axons and dendrites (Hand et al., 2005; Hand and Polleux, 2011;  
62 reviewed in Yuan and Hassan, 2014). The regulation of such neurite growth is  
63 independent from the proneural activity, as the phosphorylation of a single tyrosine in  
64 mouse Ngn2 is necessary to specify the dendritic morphology without interfering the  
65 cell fate commitment (Hand et al., 2005). However, the mechanism of how Ngn  
66 proteins regulate neurite guidance is poorly understood.

67

68 The *Drosophila* genome encodes a single member of Ngn family based on the  
69 conservation of family-defining residues in the bHLH domains (Hassan and Bellen,  
70 2000), named Target of Pox neuro (Tap). Previous work suggests that Tap is  
71 expressed in secondary progenitors of both neurons and glia, called ganglion mother  
72 cells, in CNS (Bush et al., 1996), as well as the putative support cells in the peripheral  
73 nervous system (PNS) during embryogenesis (Gautier et al., 1997). A previously  
74 reported putative *tap* mutant allele (Ledent et al., 1998) was later shown to be a  
75 mutation in a different gene called *blot* (Johnson et al., 1999). Therefore, the function  
76 of the *Drosophila* Ngn Tap remains uncharacterized.

77

78 Here we generated a null mutant allele of *tap* by replacing the single coding exon of  
79 the *tap* gene with Gal4. Using expression, gain of function and loss of function  
80 analyses we show that, whereas ectopic expression of Tap in vertebrates can induce  
81 neurogenesis, *tap* is not a proneural gene in flies, consistent with the evolutionary  
82 proneural switch hypothesis. Instead, Tap is required to prevent overgrowth of axons  
83 during brain development, at least in part through the activity of the axonal Wnt  
84 planar cell polarity (Wnt-PCP) pathway by fine tuning the levels of the Wnt signalling  
85 adaptor protein Dishevelled (Dsh).

86

## Results and Discussion

### Tap is the only Ngn homolog in *Drosophila*

*Drosophila* Tap shares significant identity (~70%) in the bHLH domain with mouse and human Ngns (**Fig. 1A**), compared to *Drosophila* Atonal or Scute. To test if Tap, like its vertebrate counterpart, has proneural activity, we injected Tap mRNA into one cell of 2-cell stage *Xenopus* embryos and assessed neurogenesis by staining for neuronal markers. Like mouse Ngn1, but unlike fly Atonal, Tap efficiently induces neurogenesis in this system (**Fig. 1B-E**). Conversely, when ectopically expressed in a classic *Drosophila* proneural assay Tap – like Ngn1, and in contrast to Atonal – fails to induce neurogenesis (**Fig. 1H-I**). These data suggest that Tap may not be a proneural gene in flies, even though it has neural induction potential in vertebrates, as expected for a bona fide Ngn protein.

### Tap is widely expressed in the nervous system during development

To investigate the function of Tap, we generated a mutant allele using ends-in homologous recombination (Rong and Golic, 2000) to replace the open reading form of *tap* with an external driver, Gal4 (**Fig. 2A**). The *tap*<sup>Gal4</sup> allele, in homozygosity, serves as a *tap* null mutant; while in heterozygosity, it was used as a driver to reveal the expression pattern of Tap. We made several attempts to generate a Tap antibody, but this was not successful. Tap<sup>Gal4</sup> was detected in a large number of cells in both the central and peripheral nervous systems throughout development (**Fig. 2B-E**). During embryogenesis, Tap is enriched in the ventral nerve cord (VNC) and sparsely expressed in the PNS (**Fig. 2B, S2**). Postembryonically, Tap positive cells were observed in many tissues, including optic lobes (OLs), MBs, antenna lobes (ALs) and subesophageal ganglion (SOG) (**Fig. 2C-E**).

### Tap is not required for specifying the neuronal or glial cell fate during embryogenesis

Flies lacking Tap are mostly embryonic lethal, with a few escapers to early larval stages. This lethality can be rescued, including to adult viability, by re-expression of Tap (*UAS::tap*) in *tap*<sup>Gal4</sup> homozygous flies. We examined whether the number or fate of neuronal and/or glial cells are altered in *tap* mutant embryos. Surprisingly, we

find no obvious morphological defects in the *tap* mutant embryos. The number and pattern of the neurons and glia in the PNS are intact. Although the cell number in the CNS is difficult to quantify, the general cellular pattern looks similar in the mutant when compared with the control flies (**Fig. 2F-I**). These data suggest that Tap is not required for early neurogenesis in *Drosophila* embryos.

#### ***tap* mutants show MB $\beta$ lobe midline-crossing and $\alpha$ lobe missing defect**

To characterize Tap function, we focused on the MB as a model system. Tap is expressed in the MB at both pupal and adult stages in a subset of  $\alpha/\beta$  neurons (**Fig. 3A-C**), which form four clusters in the cell body (**Fig 3C**) and project their medial axons to the dorsal part of  $\beta$  lobe (**Fig 3A, B**). Tap expression is highest at early pupal stages, and then declines. The phase of high levels of Tap expression correlates with the differentiation stage of  $\alpha/\beta$  neurons, indicating Tap may regulate the development of the  $\alpha/\beta$  lobe.

To circumvent embryonic lethality we began by exploiting the heterozygous *tap*<sup>Gal4</sup> allele alone or in combination with two independent RNAi strains targeting distinct regions of *tap*. In wild-type *Drosophila*, axons of the medially projecting  $\beta$  lobes terminate near the midline but do not cross it (Strausfeld et al., 2003). In contrast to the wild-type MB morphology (**Fig. 3D**), *tap* loss-of-function brains exhibit that  $\beta$  lobe fibers extend across the midline (**Fig. 3E**), sometimes sufficient to cause fusion of the two contralateral  $\beta$  lobes (**Fig. 3F**). The phenotype is variable in severity, thus we classified it as “normal”, “mild”, or “severe” based on the thickness and density of the  $\beta$  lobe fibers crossing the midline. Tap heterozygotes display an increase of the penetrance of mild defects, while both *tap* RNAi strains raise the incidence and severity of  $\beta$  lobe midline crossing defect. When Tap is re-expressed, the defect can be rescued to control levels (**Fig. 3J**). This  $\beta$  axon midline-crossing defect is developmental in origin as it can be observed at early pupal stage (**Fig. S3**).

In addition to the  $\beta$  axon midline-crossing defect, an “ $\alpha$  lobe missing” phenotype was observed in Tap loss of function MBs (**Fig. 3H, I**). In some brains with a missing  $\alpha$  lobe, the  $\beta$  lobe appears to branch into two bundles (**Fig. 3I**), suggesting this  $\alpha$  lobe defect may be an axonal targeting defect rather than a growth defect. Unlike the  $\beta$

lobe defect, the penetrance of  $\alpha$  lobe missing phenotype varies considerably (**Fig. 3J**). Considering the frequency is still higher in the *tap* mutant flies compared to wild-type and rescue strains, we conclude that Tap is essential for the growth and correct targeting of both lobes of  $\alpha/\beta$  neurons.

### 155 **Tap is required cell-autonomously for the growth and targeting of the $\beta$ lobe**

156 Since the branching and growth pattern of single  $\alpha/\beta$  axons cannot be directly inferred  
157 from the morphology of the  $\alpha/\beta$  lobes, a single-neuron level analysis, such as Mosaic  
158 analysis with a repressible cell marker (MARCM), is necessary to clarify the targeting  
159 of  $\alpha/\beta$  neurons (Lee et al., 2000). Therefore *tap* null clones were generated in a *tap*<sup>Gal4</sup>  
160 heterozygous background using the MARCM technique. In both wild-type control  
161 and *tap*<sup>Gal4</sup> heterozygous background, a small minority of brains showed  $\beta$  lobe  
162 overgrowth and/or  $\alpha$  lobe missing defect as discussed above. Considering this, only  
163 brains with intact over all  $\alpha/\beta$  lobes morphology were quantified for clonal axon  
164 phenotypes. Analysis of small MB clones reveals that none of the control clones show  
165 any defects (**Fig. 3K**). In contrast, in 32% of *tap* null mutant clones,  $\beta$  axons project  
166 beyond the  $\beta$  lobe domains (**Fig. 3L, N**). In severe cases, axons were observed to  
167 cross the midline and project to the contralateral  $\beta$  lobes. This defect can be rescued  
168 by re-introduction of *tap* specifically in the mutant clones (**Fig. 3M, N**). This suggests  
169 Tap is required cell-autonomously for the development of the  $\beta$  axon branch.  
170 However, none of the mutant clones showed loss of  $\alpha$  axon growth, suggesting Tap  
171 plays a non-cell-autonomous role during  $\alpha$  lobe development.

### 172 **Tap regulates axon growth through Dsh**

173 In order to investigate the molecular mechanism of how Tap regulates axonal growth,  
174 we performed dominant interaction tests between Tap and well-established MB  
175 axonal guidance factors, particularly those whose loss of function causes  $\beta$  lobe  
176 overgrowth. Specifically, we asked if heterozygosity for any of these genes strongly  
177 enhances the very mild phenotypes observed in *tap* heterozygotes over the sum of the  
178 phenotypes observed in each allele. Among the candidate genes, *drl*, *Sli* and *Dscam1*  
179 did not show any obvious synergism with Tap (**Fig. 4A**). However, loss of one copy  
180 of *dsh* strongly enhances both  $\alpha$  lobe guidance and  $\beta$  lobe overgrowth defects in the  
181 *tap* heterozygous background (**Fig. 4A, B**). This suggests that Dsh synergizes with  
182 Tap to regulate the axon guidance and growth during MB development. To test if Tap

might regulate Dsh expression *in vivo* we overexpressed Tap or knocked it down in all neurons and measured Dsh protein levels. We find that Tap gain of function mildly increased Dsh levels, while *Tap* knockdown mildly decreases Dsh levels *in vivo* (**Fig. 4C, D**), although these changes are not strong enough to reach statistical significance.

Dsh is a key component in Wnt signaling pathway, which serves as a hub to relay the signals from the receptors to the downstream effectors (Gao and Chen, 2010). It is essential in both canonical and non-canonical Wnt pathway, such as Wnt-PCP pathway. In *Drosophila*, PCP pathway is known to regulate distinct phenomena including polarity within cell sheets (Fanto and McNeill, 2004), dendritic arborization (Gao et al., 2000) and axonal growth and guidance (Ng, 2012) and the role of Dsh in MB  $\beta$  lobe axonal growth is mediated by its activity in the Wnt-PCP pathway (Shimizu et al., 2011). To further query the interaction between Tap and Dsh we took advantage of the Wnt-PCP specific allele of Dsh in *Drosophila*, *dsh*<sup>1</sup>. Interestingly, the combination of *dsh*<sup>1</sup> and *tap* heterozygosity increases the severity of  $\beta$  lobe overgrowth defect to a similar level as double heterozygote of *tap* and the null allele of *dsh*, *dsh*<sup>6</sup>, but does not affect the  $\alpha$  lobe missing defect (**Fig. 4B**). These data suggest that the role of Tap in the regulation of axonal growth and guidance in  $\alpha$  lobe and  $\beta$  lobe are independent. Furthermore, this is consistent with previous findings that Wnt-PCP signaling  $\beta$  lobe growth cell autonomously, but  $\alpha$  lobe growth cell non-autonomously (Soldano et al., 2013). In addition to Dsh, three other key Wnt-PCP components regulate  $\alpha\beta$  lobe growth namely, Appl and Vang and Wnt5a. We find that heterozygosity for all three mildly enhances the *tap* defect, but much less than Dsh does, suggesting that Tap regulates PCP signaling specifically through Dsh (**Fig. S4**).

Our data suggest that *tap* regulates neuronal extension and guidance through the Wnt-PCP pathway. Cellular polarity created by the PCP pathway is essential to direct cell movement, which is analogous to guide the movement of growth cones, thus navigate the axonal growth (Zou, 2012). The regulation of PCP pathway was characterized via protein-protein interactions previously. For instance, Vangl2, one core receptor of PCP pathway in mammalian, is found to antagonize with Disheveled, the mammalian homolog of *Drosophila* Dsh, and posttranslationally regulate another receptor protein, Frizzled3, to transmit the information to the downstream target genes of PCP signaling pathway, in such a way to regulate the polarity of growth cones in the

217 filopodia (Shafer et al., 2011). Here we identify a transcriptional modulator of the  
 218 PCP pathway during axonal growth, although it is unclear whether Dsh is a direct or  
 219 indirect target of Tap. The changes in Dsh protein levels upon Tap manipulation are  
 220 quite mild suggesting that Tap does not serve as an activator, but as an enhancer of  
 221 the PCP pathway. This, however, is consistent with the observation that double  
 222 heterozygosity for *tap* and *dsh* phenocopies the strongest knock down of *tap*. This  
 223 implies that the neuronal Wnt-PCP pathway is sensitive to the quantitative regulation  
 224 of Dsh by Tap.

225

226 In contrast to the potential conservation of its function in neurite growth, Tap does not  
 227 act as proneural gene in flies. Despite of the obvious differences in morphology  
 228 between invertebrates and vertebrates, the fundamental mechanisms underlying  
 229 neurogenesis are conserved. In particular, the induction of neurogenesis by bHLH  
 230 proteins has been conceptually defined as a module that can be applied to various  
 231 contexts (Schlosser and Wagner, 2004). Our data, together with previous studies,  
 232 suggest that during the split between vertebrates and invertebrates, the neurogenic  
 233 module exchanged one of its major components resulting in a switch in the sensitivity  
 234 of the vertebrate, but invertebrate neuroectoderm to the neuroinductive activity of  
 235 Neurogenin proteins. Crucially, this is not encoded as a change in the inductive  
 236 capacity of the invertebrate Neurogenins per se, as demonstrated by Tap's neurogenic  
 237 activity in *Xenopus*. Whether this is related to the dorso-ventral axis switch in the  
 238 location of the neuroectoderm (dorsal in vertebrates, ventral in *Drosophila*) would be  
 239 interesting to determine.

240



## Figure legends

### Figure 1 Tap is the Ngn homolog in *Drosophila*.

**A.** Sequence comparison among bHLH domain of fly Tap, mouse Ngn family, fly Ato and Scute. The three residues in basic domain (red) were identified as defining the proneural function of Ngn and Ato in vertebrates and flies respectively. The ten residues in the second Helix domain (blue) are also class-specific (Quan et al., 2004). Dme: *Drosophila Melanogaster*; Mm: *Mus musculus*. **B-E.** *In situ* hybridization of N-tubulin is used to visualize neurogenesis in *Xenopus* embryos upon no injection (**B**), mRNA of mouse Ngn1 (**C**), Ato (**D**) or Tap (**E**), (arrowhead). **F-I'**. The distribution of neuronal precursors (Sens, green) in L3 wing discs. CD8::GFP (**F**), mouse Ngn1 (**G**), Ato (**H**) or Tap-GFP (**I**) is ectopically expressed in the anterior-posterior axis of wing discs (magenta), driven by *dpp-Gal4*. Scale bars=100  $\mu$ m.

### Figure 2 Characterization of Tap expression pattern.

**A.** Schematic diagram of generation of *tap*<sup>Gal4</sup> allele. **B-E.** Tap is widely expressed in nervous system throughout development. Tap<sup>+</sup> cells were labelled by membrane GFP (mGFP) driven by *tap*<sup>Gal4</sup>. **B.** Ventral view of a stage 16 embryo. VNC: ventral nerve cord. **C.** A L3 brain. OL: optic lobe. **D.** Brain of a 24h APF pupa. MB: mushroom body; AL: antenna lobe; SOG: subesophageal ganglion. **E.** An adult brain. **F-I.** Flat preparation of whole embryos at stage 17. Tap<sup>+</sup> cells are labelled with CD8::RFP. The differentiated nervous system is visualized as neurons (red) and glia cells (blue). **F.** *tap* heterozygous (*tap*<sup>Gal4/+</sup>) embryo. **G.** Magnification of the region framed in **F**. **H.** *tap* null (*tap*<sup>Gal4/Gal4</sup>) embryo. **I.** Magnification of the framed region in **H**. Scale bar=100  $\mu$ m.

### Figure 3 Tap is required for the axonal growth and guidance of MB $\alpha/\beta$ neurons.

**A-B.** Z projection of MB axon level at 48h APF pupa (**A**) or adult (**B**). FasII (magenta) strongly labels the  $\alpha$  and  $\beta$  lobes, and weakly labels  $\gamma$  lobes (**A'**, **B'**). GFP expression is restricted to a subset of axons in the distal region of  $\alpha$  lobes and ventral

272 region of  $\beta$  lobes. **C.** GFP is concentrated in four clusters of cells (arrowhead) within  
 273 MB cell bodies (magenta). **D.** Normal MBs in a wild-type fly. **E.** A *tap* heterozygous  
 274 mutant brain exhibits mild  $\beta$  axon midline crossing defect in which the thickness of  
 275 the fiber bundle crossing the midline is less than the width of the  $\beta$  lobe termini  
 276 (arrowhead). **F.** A *tap* knock-down MB using RNAi appears severe  $\beta$  lobe fusion  
 277 defect in which the crossing fibers equal in width to the terminal of adjacent  $\beta$  lobes  
 278 (arrowhead). **G.** Normal MBs in a wild-type fly. **H-I.** *tap* mutants lose the dorsal  
 279 projection of  $\alpha/\beta$  neurons (asterisks). The loss of dorsal lobe is sometimes  
 280 accompanied by the bifurcation of the medial lobe (arrowhead in **I**). **J.** Fraction of  
 281 brains that displays the defects. Numbers of the brains being analysed were indicated  
 282 in the bracket. ns:  $p=0.9242$ ; \*:  $p=0.0280$ ; \*\*\*\*:  $p<0.0001$ , Chi-squared test. **K-M.**  
 283 One half of the adult MBs. Axonal projections of labelled MB neurons generated by  
 284 MARCM were visualized by GFP driven by *ey<sup>OK107</sup>-Gal4*. **K.** A control clone. **L.** *tap*  
 285 null clones.  $\beta$  axons exceed the region of  $\beta$  lobe, extending to the contralateral  $\beta$  lobe  
 286 region (arrowhead). **M.** A rescue clone in which Tap is re-introduced in the mutant  
 287 clonal cell only. **N.** Fraction of clones that displays the defect of  $\beta$ -axon overgrowth.  
 288 Numbers of the clones being analysed were indicated in the bracket. ns:  $p=0.1224$ ,  
 289 \*\*\*\*:  $p<0.0001$ , \*\*\*:  $p=0.0009$ , Chi-squared test. Scale bar = 50  $\mu$ m.  
 290

#### 291 **Figure 4 Tap regulates axon guidance through Dsh in PCP pathway.**

292 **A.** Genetic interactions for the defect of  $\beta$ -lobe overgrowth in double heterozygous  
 293 mutant between Tap and axon guidance factors known to cause  $\beta$ -lobe overgrowth.  
 294 The penetrance of total  $\beta$  lobe overgrowth defect was normalized to the sum of the  
 295 penetrance of *tap* mutant plus the mutant of candidate genes. Dashed line indicates 1,  
 296 which represents the normalized defect severity aggregated by the two single mutants.  
 297 **B.** Fraction of brains that displays the defects in *tap* and *dsh* double heterozygous  
 298 mutant. Numbers of the brains being analysed were indicated in the bracket. *dsh<sup>l</sup>* is a  
 299 PCP pathway specific mutant of *dsh*, and *dsh<sup>6</sup>* is the loss-of-function mutant of *dsh*.  
 300 **C.** Western blot analysis showing Dsh level in driver alone (C), Tap overexpression  
 301 (OE) or knockdown (KD) cases. Actin is used as a loading control. **D.** Quantification  
 302 of relative changes in Dsh level of OE or KD, normalized by control. Error bars  
 303 represent the s.e.m.,  $n=3$ .  
 304

## Material and Methods

A brief description of the material and methods is presented here. Please see supplemental for detailed experimental procedures.

### Fly Husbandry and Transgenic Lines

Flies were kept at 25°C or 29°C on standard medium. Experiments involving RNAi technique, or genetic interaction were performed at 29°C, and the others were performed at 25°C.

### *Xenopus* embryo microinjection

The mRNAs of *ato*, *tap* and mouse *Ngn1* were injected in a single blastomere of *Xenopus* embryos at the two-cell stage. The whole embryos were *in situ* hybridized with anti-N-tubulin as described in (Quan et al., 2004).

### Cloning and gene targeting

The fragments of 5' homologous recombination arm of *tap* ORF, Gal4 and 3' recombination arm of *tap* ORF were amplified and subcloned into pED13(M) vector (gifted from B. Dickson lab). *tap* targeting was achieved by ends-in homologous recombination described in Fig. S1 and (Rong and Golic, 2000).

### Immuohistochemistry

Embryos and dissected tissues were stained using the protocol described in (Hassan et al., 2000; Langen et al., 2013). Flat preparation of embryonic fillets at stage 17 were generated and stained on polylysine-coated glass following the protocol described in (Featherstone et al., 2009). Pictures were acquired using LEICA TCS SP8 or LEICA TCS SP5 and processed with ImageJ.

### Western blot

Proteins from 20 adult fly brains in each genotype were resolved and probed using the protocol described in (Okroy et al., 2015). Primary antibodies were used as: anti-Dsh 1:1000 (gifted from C. Bagni lab) and anti-Actin 1:5000 (Abcam).

## Acknowledgements and Funding

LY acknowledge discussion with A. Soldano and M. Nicolas, as well as G. Linneweber for the technical help of flat preparation of embryo samples. This work was supported by Fonds Wetenschappelijke Onderzoeks [G050312 to X.Q and B.A.H.], by the Vlaams Instituut voor Biotechnologie [to B.A.H.], by a doctoral fellowship from China Scholarship Council [2010638041 to L.Y.] and a grant from the National Natural Science Foundation of China [31171256 to S.H.]. XR was a research fellow from the FRIA.

## Competing interests

The authors declare that they have no competing interests.

## Author contributions

LY conceived and designed the study, collected and analyzed the data, wrote the manuscript. SH generated the mutant of *tap*<sup>Gal4</sup> and collected data. ZO helped with the genetic interaction screen. XR performed the microinjection of *Xenopus* embryos. NDG carried out the western blot analyses. AK and JY carried out the cloning and provided technical assistance. EB conceived and guided the gain of function experiments. BAH and XQ conceived and supervised the study, and wrote the manuscript. All authors read and approved the final manuscript.

## References

- Bertrand, N., Castro, D. S. and Guillemot, F.** (2002). Proneural genes and the specification of neural cell types. *Nat Rev Neurosci* **3**, 517-530.
- Bush, A., Hiromi, Y. and Cole, M.** (1996). Biparous: a novel bHLH gene expressed in neuronal and glial precursors in *Drosophila*. *Developmental biology* **180**, 759-772.

362 **Fanto, M. and McNeill, H.** (2004). Planar polarity from flies to vertebrates. *J*  
363 *Cell Sci* **117**, 527-533.

364 **Featherstone, D. E., Chen, K. and Broadie, K.** (2009). Harvesting and preparing  
365 *Drosophila* embryos for electrophysiological recording and other procedures. *J Vis*  
366 *Exp.*

367 **Gao, C. and Chen, Y. G.** (2010). Dishevelled: The hub of Wnt signaling. *Cell*  
368 *Signal* **22**, 717-727.

369 **Gao, F. B., Kohwi, M., Brenman, J. E., Jan, L. Y. and Jan, Y. N.** (2000).  
370 Control of dendritic field formation in *Drosophila*: the roles of flamingo and  
371 competition between homologous neurons. *Neuron* **28**, 91-101.

372 **Gautier, P., Ledent, V., Massaer, M., Dambly-Chaudiere, C. and Ghysen, A.**  
373 (1997). tap, a *Drosophila* bHLH gene expressed in chemosensory organs. *Gene*  
374 **191**, 15-21.

375 **Hand, R., Bortone, D., Mattar, P., Nguyen, L., Heng, J. I., Guerrier, S., Boutt,**  
376 **E., Peters, E., Barnes, A. P., Parras, C., et al.** (2005). Phosphorylation of  
377 Neurogenin2 specifies the migration properties and the dendritic morphology of  
378 pyramidal neurons in the neocortex. *Neuron* **48**, 45-62.

379 **Hand, R. and Polleux, F.** (2011). Neurogenin2 regulates the initial axon guidance  
380 of cortical pyramidal neurons projecting medially to the corpus callosum. *Neural*  
381 *development* **6**, 30.

382 **Hassan, B. A. and Bellen, H. J.** (2000). Doing the MATH: is the mouse a good  
383 model for fly development? *Genes & development* **14**, 1852-1865.

384 **Hassan, B. A., Bermingham, N. A., He, Y., Sun, Y., Jan, Y. N., Zoghbi, H. Y.**  
385 **and Bellen, H. J.** (2000). atonal regulates neurite arborization but does not act as  
386 a proneural gene in the *Drosophila* brain. *Neuron* **25**, 549-561.

387 **Johnson, K., Knust, E. and Skaer, H.** (1999). bloated tubules (blot) encodes a  
388 *Drosophila* member of the neurotransmitter transporter family required for  
389 organisation of the apical cytocortex. *Developmental biology* **212**, 440-454.

390 **Langen, M., Koch, M., Yan, J., De Geest, N., Erfurth, M. L., Pfeiffer, B. D.,**  
391 **Schmucker, D., Moreau, Y. and Hassan, B. A.** (2013). Mutual inhibition among  
392 postmitotic neurons regulates robustness of brain wiring in *Drosophila*. *Elife* **2**,  
393 e00337.

394 **Ledent, V., Gaillard, F., Gautier, P., Ghysen, A. and Dambly-Chaudiere, C.**  
395 (1998). Expression and function of tap in the gustatory and olfactory organs of  
396 *Drosophila*. *The International journal of developmental biology* **42**, 163-170.

397 **Lee, T., Winter, C., Marticke, S. S., Lee, A. and Luo, L.** (2000). Essential roles  
398 of *Drosophila* RhoA in the regulation of neuroblast proliferation and dendritic but  
399 not axonal morphogenesis. *Neuron* **25**, 307-316.

400 **Ma, Q., Chen, Z., del Barco Barrantes, I., de la Pompa, J. L. and Anderson,**  
401 **D. J.** (1998). neurogenin1 is essential for the determination of neuronal precursors  
402 for proximal cranial sensory ganglia. *Neuron* **20**, 469-482.

403 **Ng, J.** (2012). Wnt/PCP proteins regulate stereotyped axon branch extension in  
404 *Drosophila*. *Development* **139**, 165-177.

405 **Okray, Z., de Esch, C. E., Van Esch, H., Devriendt, K., Claeys, A., Yan, J.,**  
406 **Verbeeck, J., Froyen, G., Willemsen, R., de Vrij, F. M., et al.** (2015). A novel  
407 fragile X syndrome mutation reveals a conserved role for the carboxy-terminus in  
408 FMRP localization and function. *EMBO Mol Med* **7**, 423-437.

409 **Quan, X. J., Denayer, T., Yan, J., Jafar-Nejad, H., Philippi, A., Lichtarge, O.,**  
410 **Vleminckx, K. and Hassan, B. A.** (2004). Evolution of neural precursor

411 selection: functional divergence of proneural proteins. *Development* **131**, 1679-  
412 1689.

413 **Rong, Y. S. and Golic, K. G.** (2000). Gene targeting by homologous  
414 recombination in *Drosophila*. *Science* **288**, 2013-2018.

415 **Schlosser, G. and Wagner, G. n. P.** (2004). *Modularity in development and*  
416 *evolution*. Chicago: University of Chicago Press.

417 **Shafer, B., Onishi, K., Lo, C., Colakoglu, G. and Zou, Y.** (2011). Vangl2  
418 promotes Wnt/planar cell polarity-like signaling by antagonizing Dvl1-mediated  
419 feedback inhibition in growth cone guidance. *Dev Cell* **20**, 177-191.

420 **Shimizu, K., Sato, M. and Tabata, T.** (2011). The Wnt5/planar cell polarity  
421 pathway regulates axonal development of the *Drosophila* mushroom body neuron.  
422 *The Journal of neuroscience : the official journal of the Society for Neuroscience*  
423 **31**, 4944-4954.

424 **Soldano, A., Okray, Z., Janovska, P., Tmejova, K., Reynaud, E., Claeys, A.,**  
425 **Yan, J., Atak, Z. K., De Strooper, B., Dura, J. M., et al.** (2013). The *Drosophila*  
426 homologue of the amyloid precursor protein is a conserved modulator of Wnt PCP  
427 signaling. *PLoS Biol* **11**, e1001562.

428 **Strausfeld, N. J., Sinakevitch, I. and Vilinsky, I.** (2003). The mushroom bodies  
429 of *Drosophila melanogaster*: an immunocytological and golgi study of Kenyon  
430 cell organization in the calyces and lobes. *Microscopy research and technique* **62**,  
431 151-169.

432 **Yuan, L. and Hassan, B. A.** (2014). Neurogenins in brain development and  
433 disease: an overview. *Archives of biochemistry and biophysics* **558**, 10-13.

434 **Zou, Y.** (2012). Does planar cell polarity signaling steer growth cones? *Curr Top*  
435 *Dev Biol* **101**, 141-160.

436

437

438



| <b>A</b> | basic        |                  | Helix            | Loop                     | Helix                  |
|----------|--------------|------------------|------------------|--------------------------|------------------------|
|          | Tap_Dme      | RRMKANDRERNR     | MHNLNDALEKLRVTLP | SLPEETK                  | LTKEIILRFAHNYIFALEQVLE |
| Ngn1_Mm  | RRVKANDRERNR | MHNLNAALDALRSVLP | SFPDDTK          | LTKEIETLRFAYNYIWALAETLR  |                        |
| Ngn2_Mm  | RRLKANNRERNR | MHNLNAALDALREVLP | TFPEDAK          | LTKEIETLRFAHNYIWALTETLR  |                        |
| Ngn3_Mm  | RRVKANDRERNR | MHNLNSALDALRGVLP | TFPDDAK          | LTKEIETLRFAHNYIWALTQTTLR |                        |
| Ato_Dme  | RRLAANARERRR | MQNLNQAFDRLRQYLP | CLGNDRQ          | LSKHETLQMAQTYISALGDLLR   |                        |
| Sc_Dme   | RR---NARERNR | VKQVNNSFARLRQHIP | GRGPHKK          | ISKVDTLRIAVEVIRRL-QDL-   |                        |

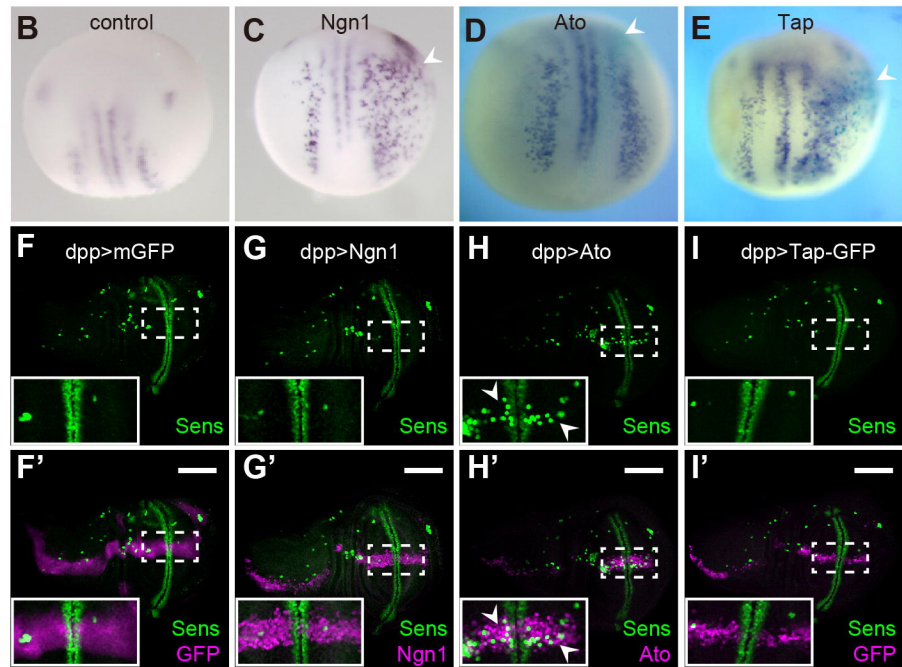



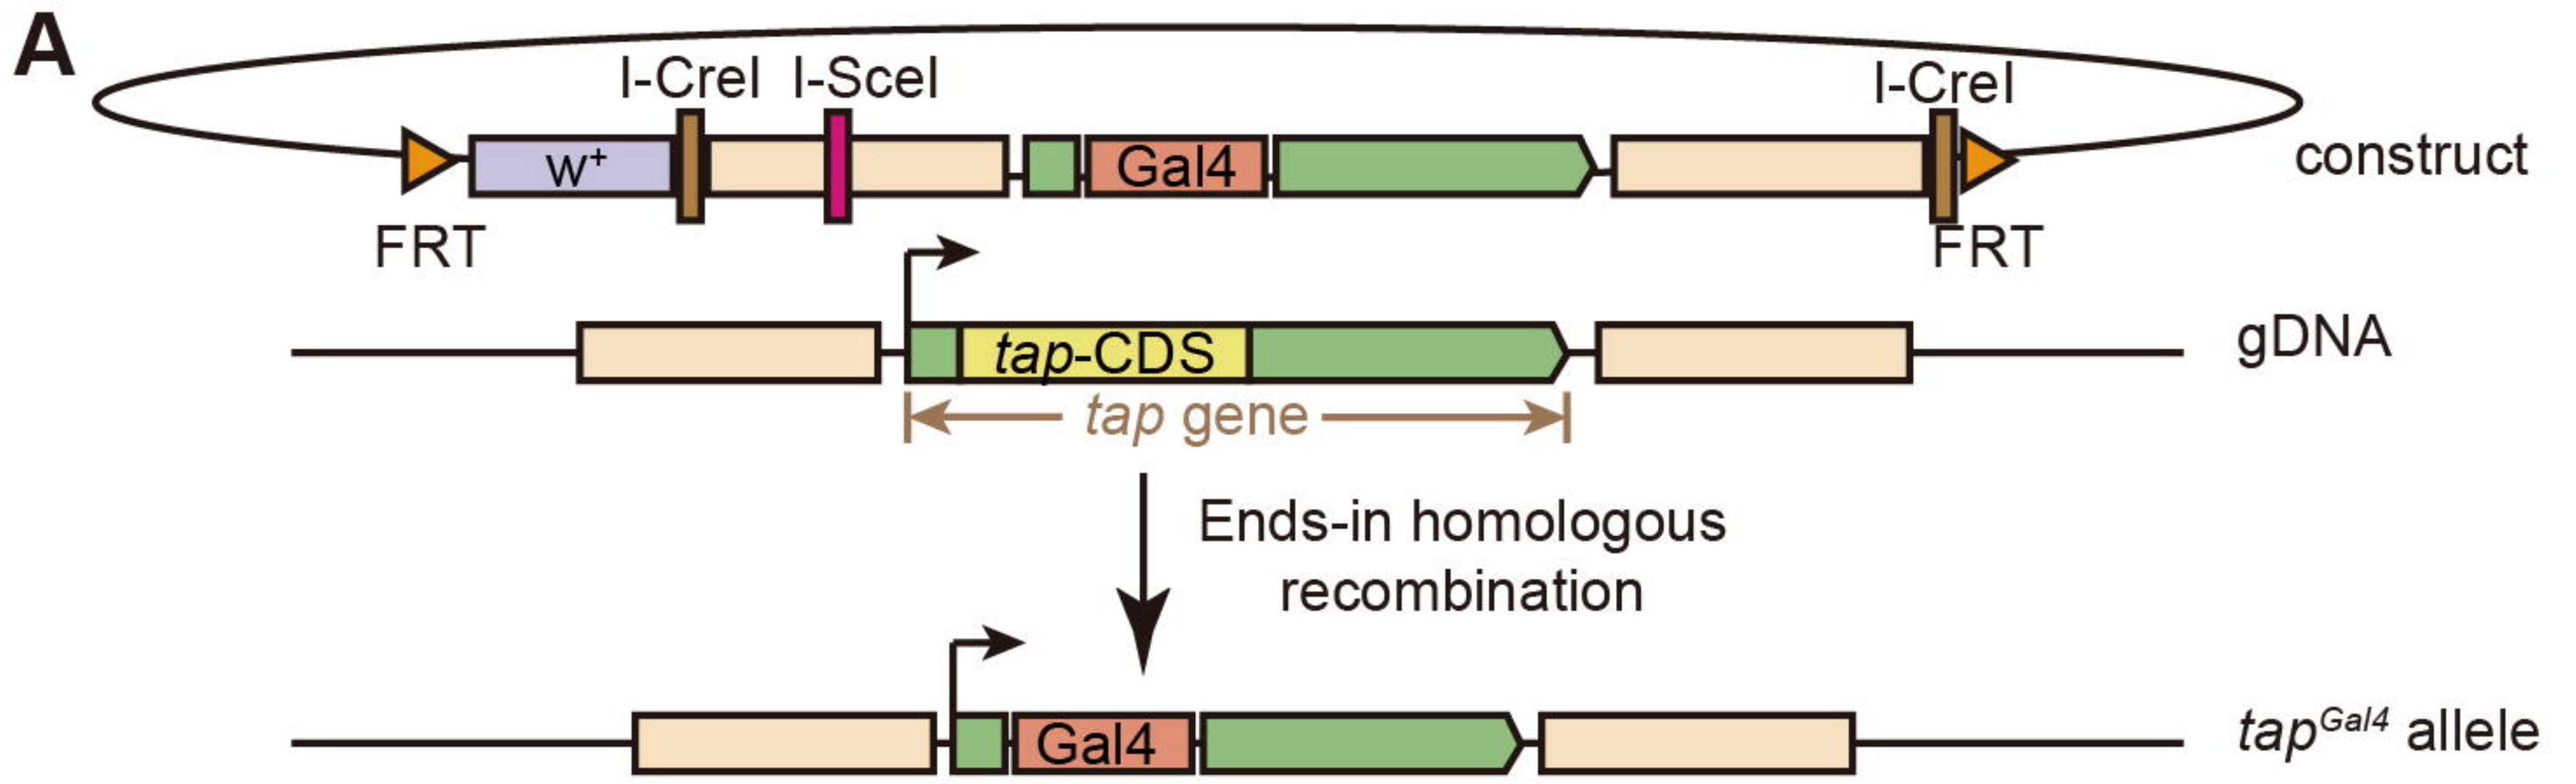

embryo

3rd instar larva

24hr APF pupa

adult

*tap*<sup>Gal4</sup>>mGFP

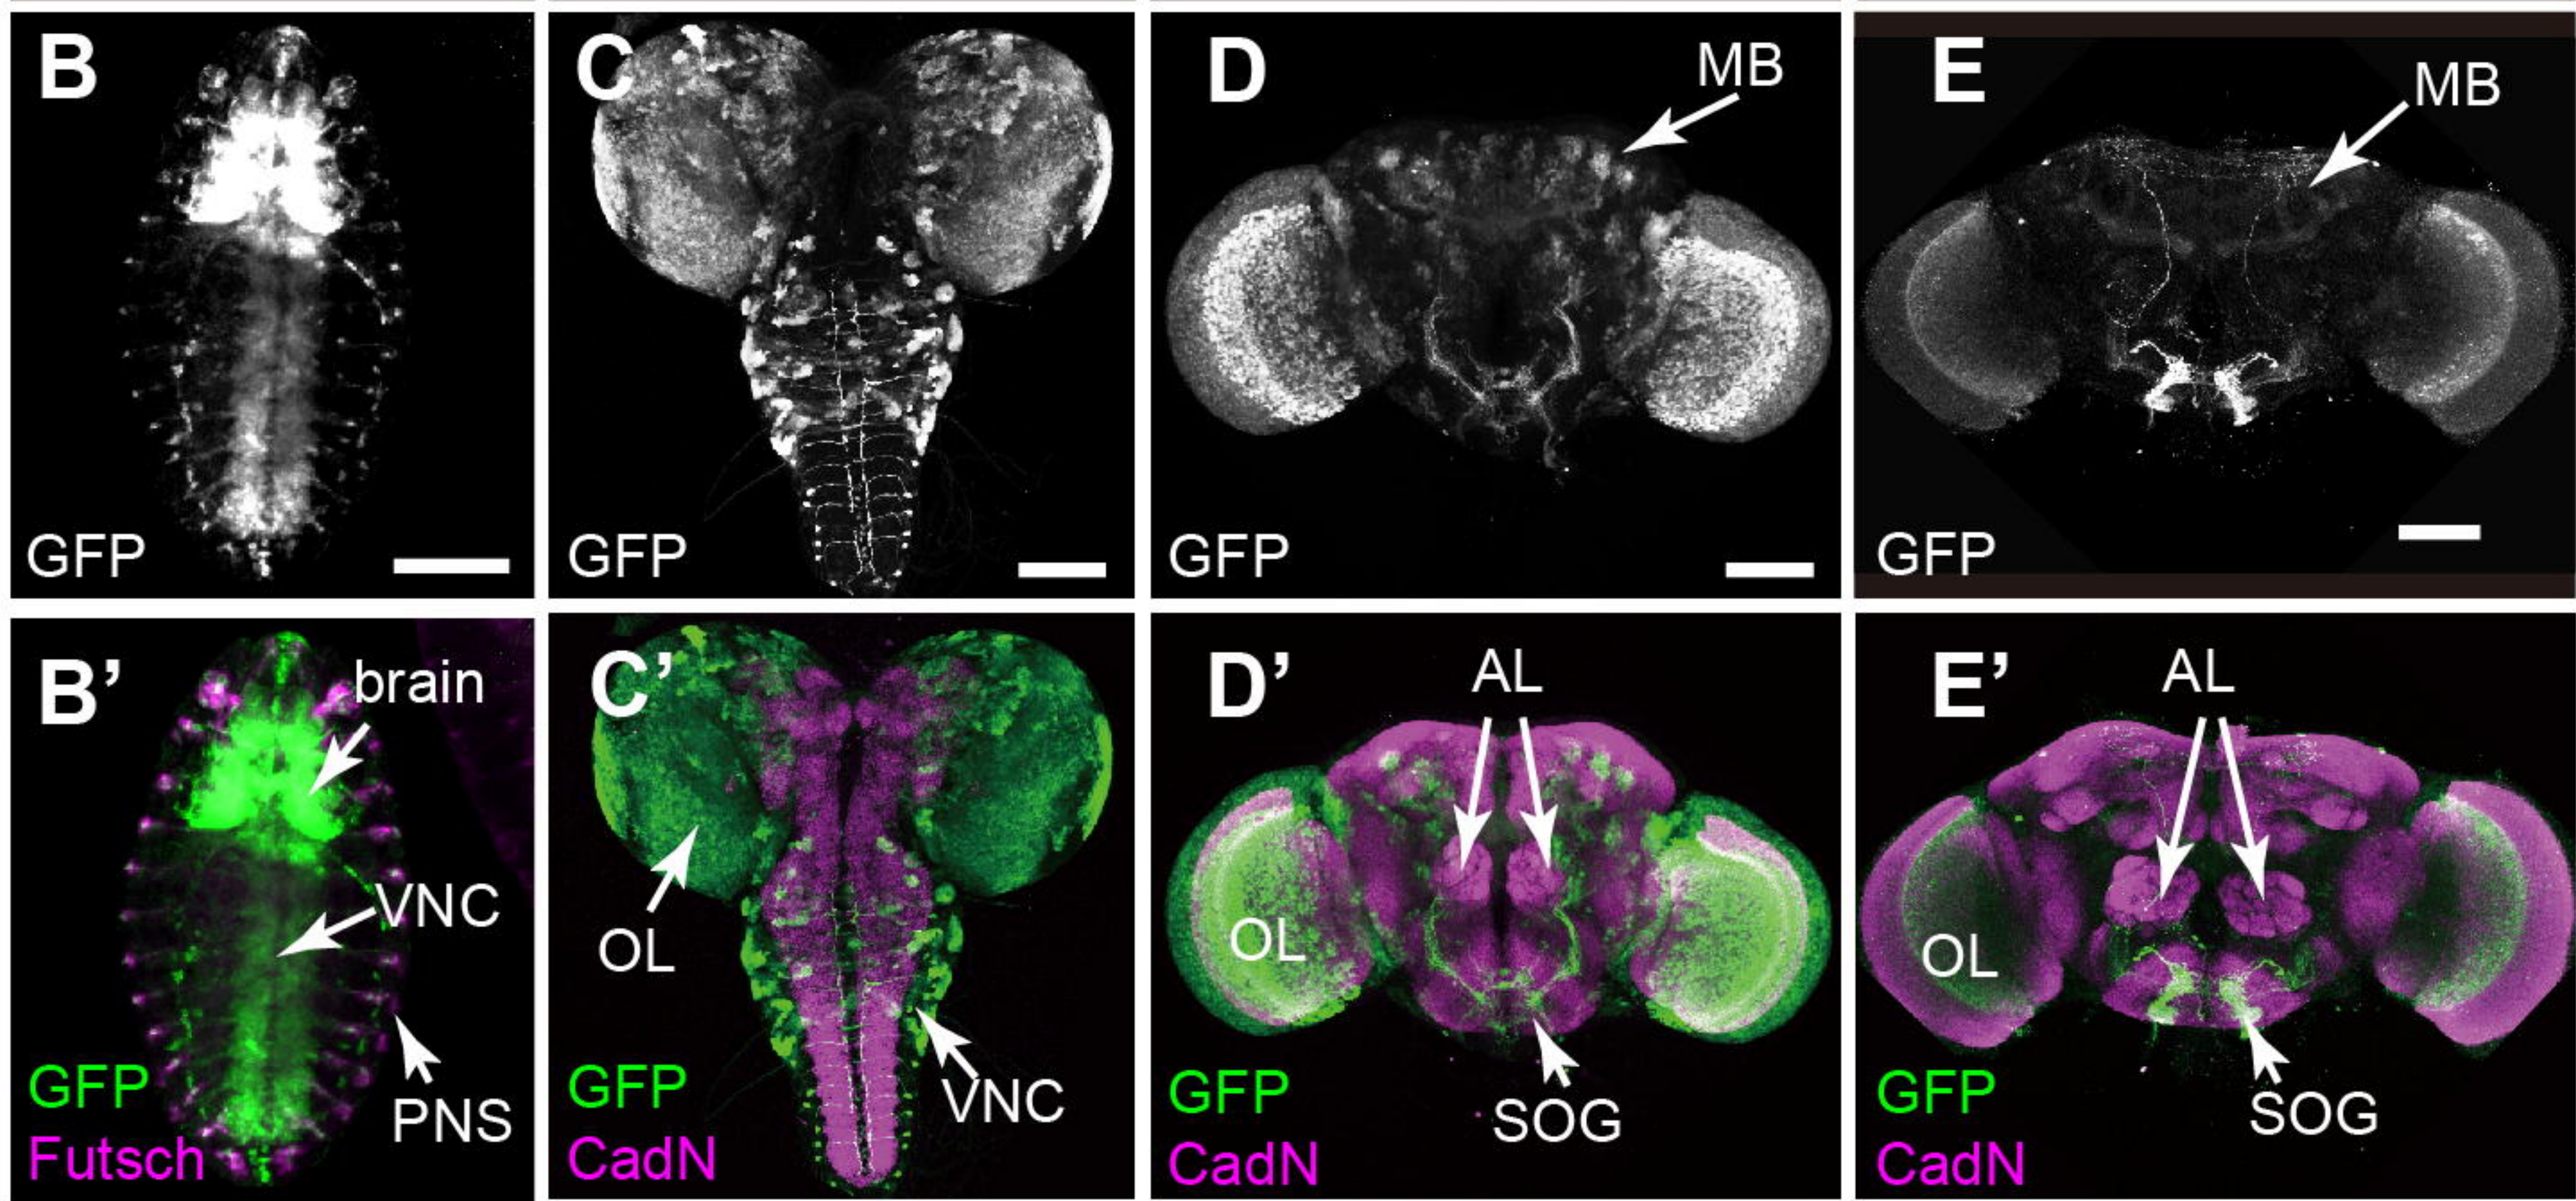

*tap*<sup>-/-</sup>

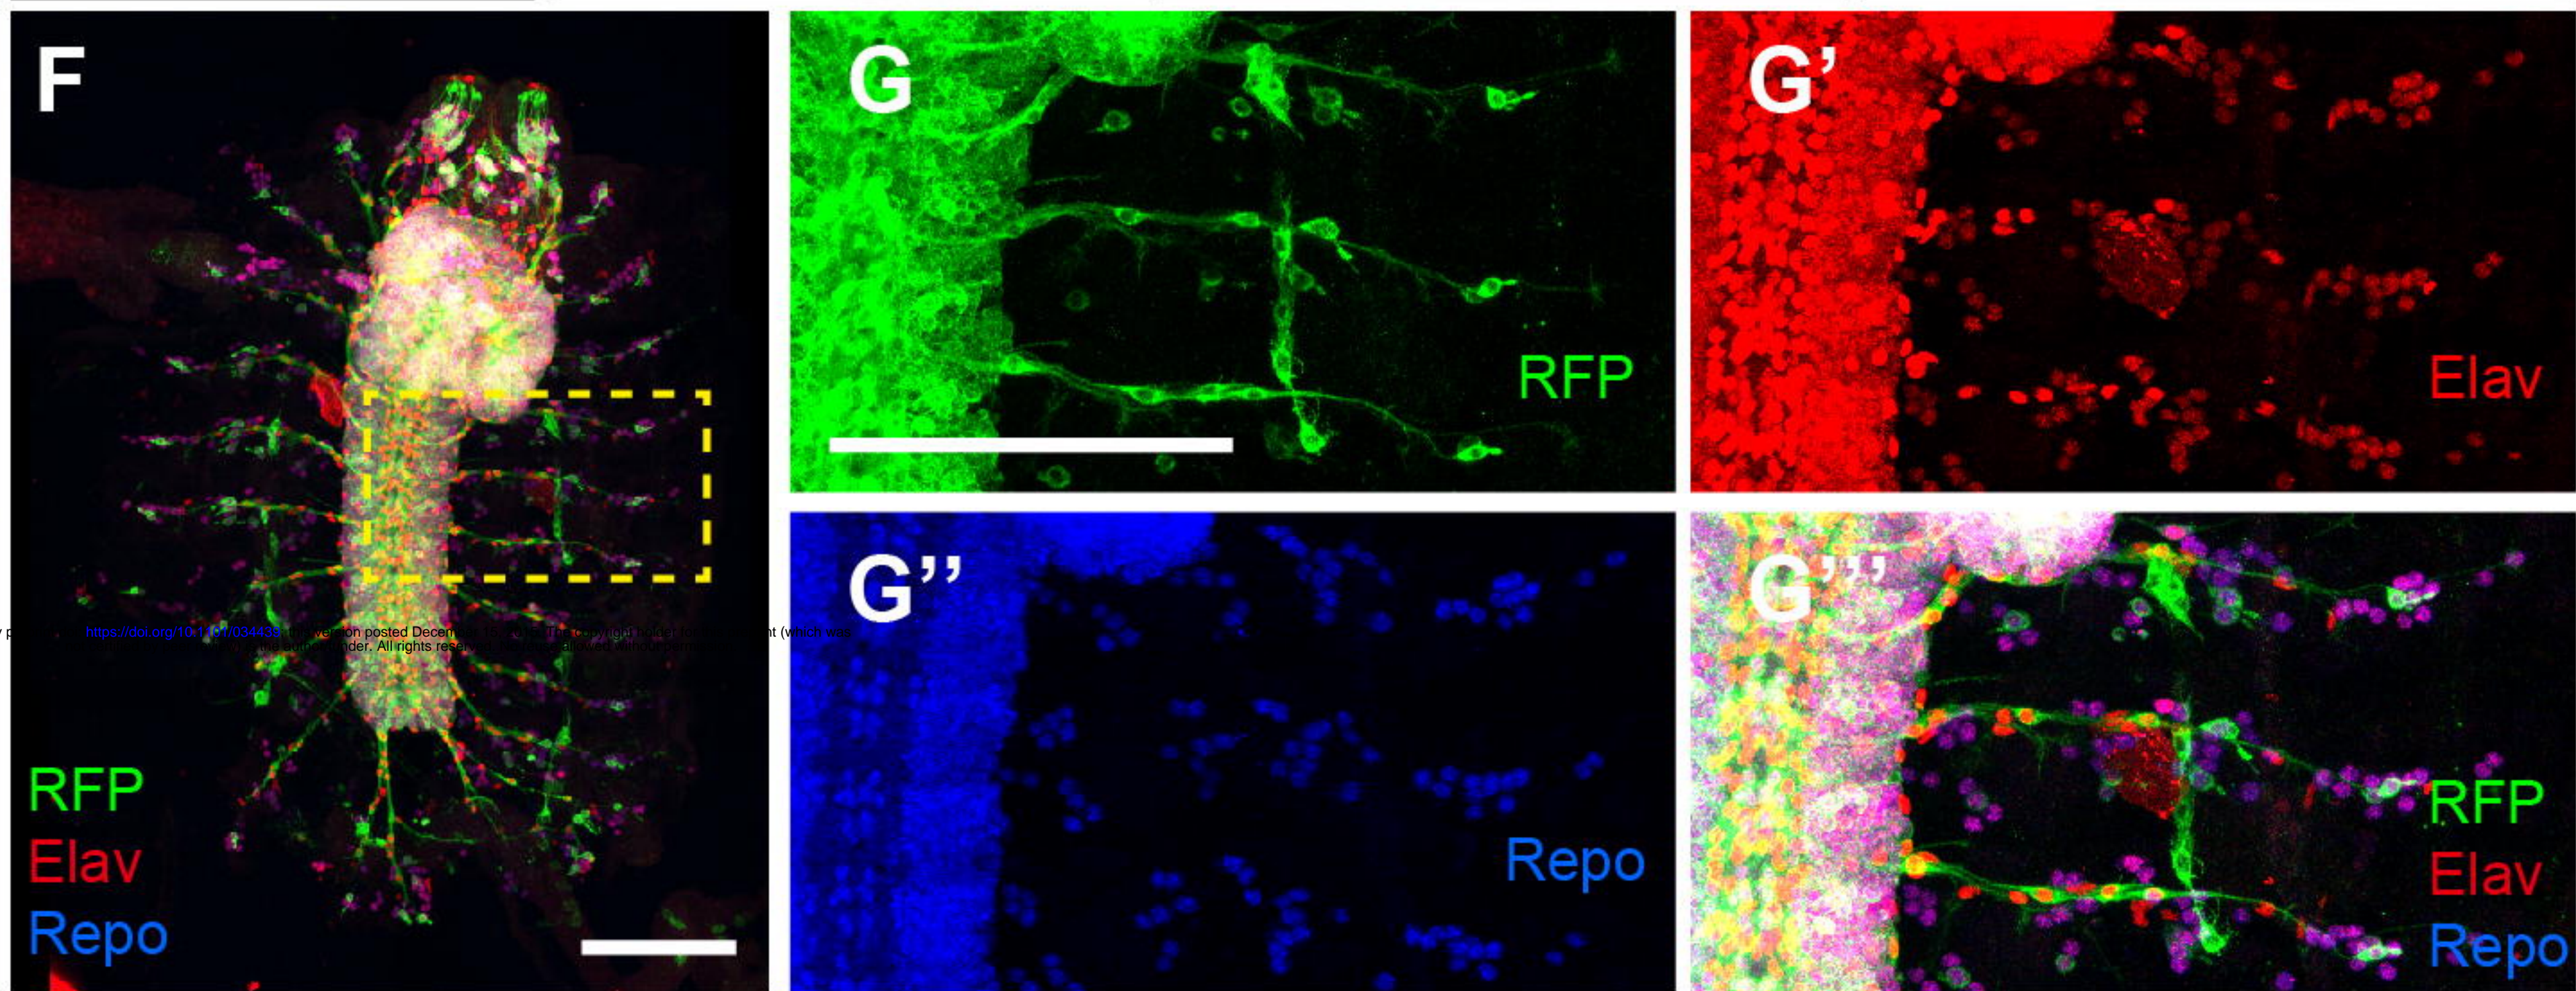

*tap*<sup>-/-</sup>

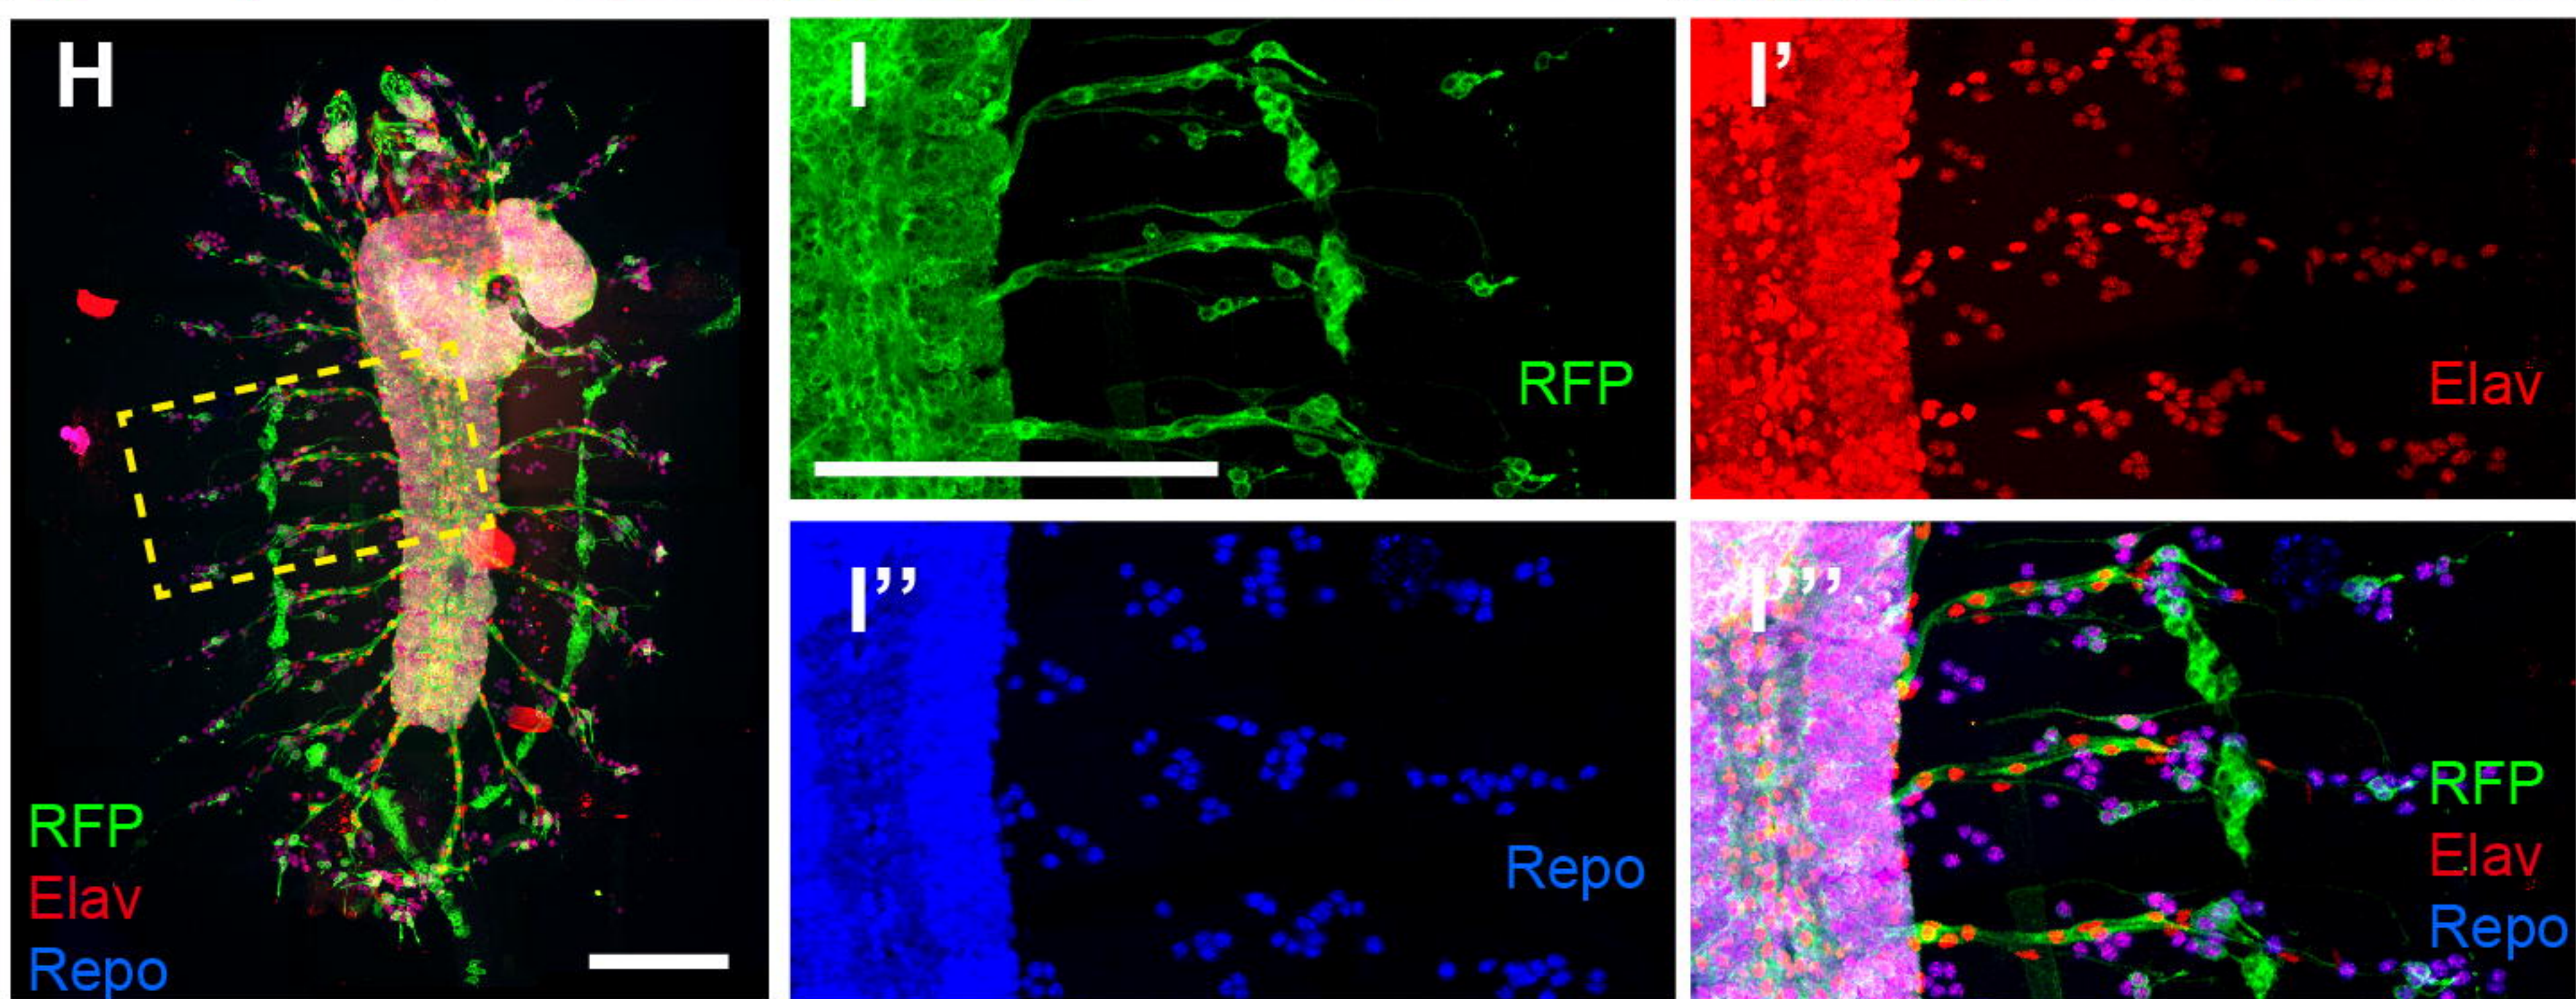



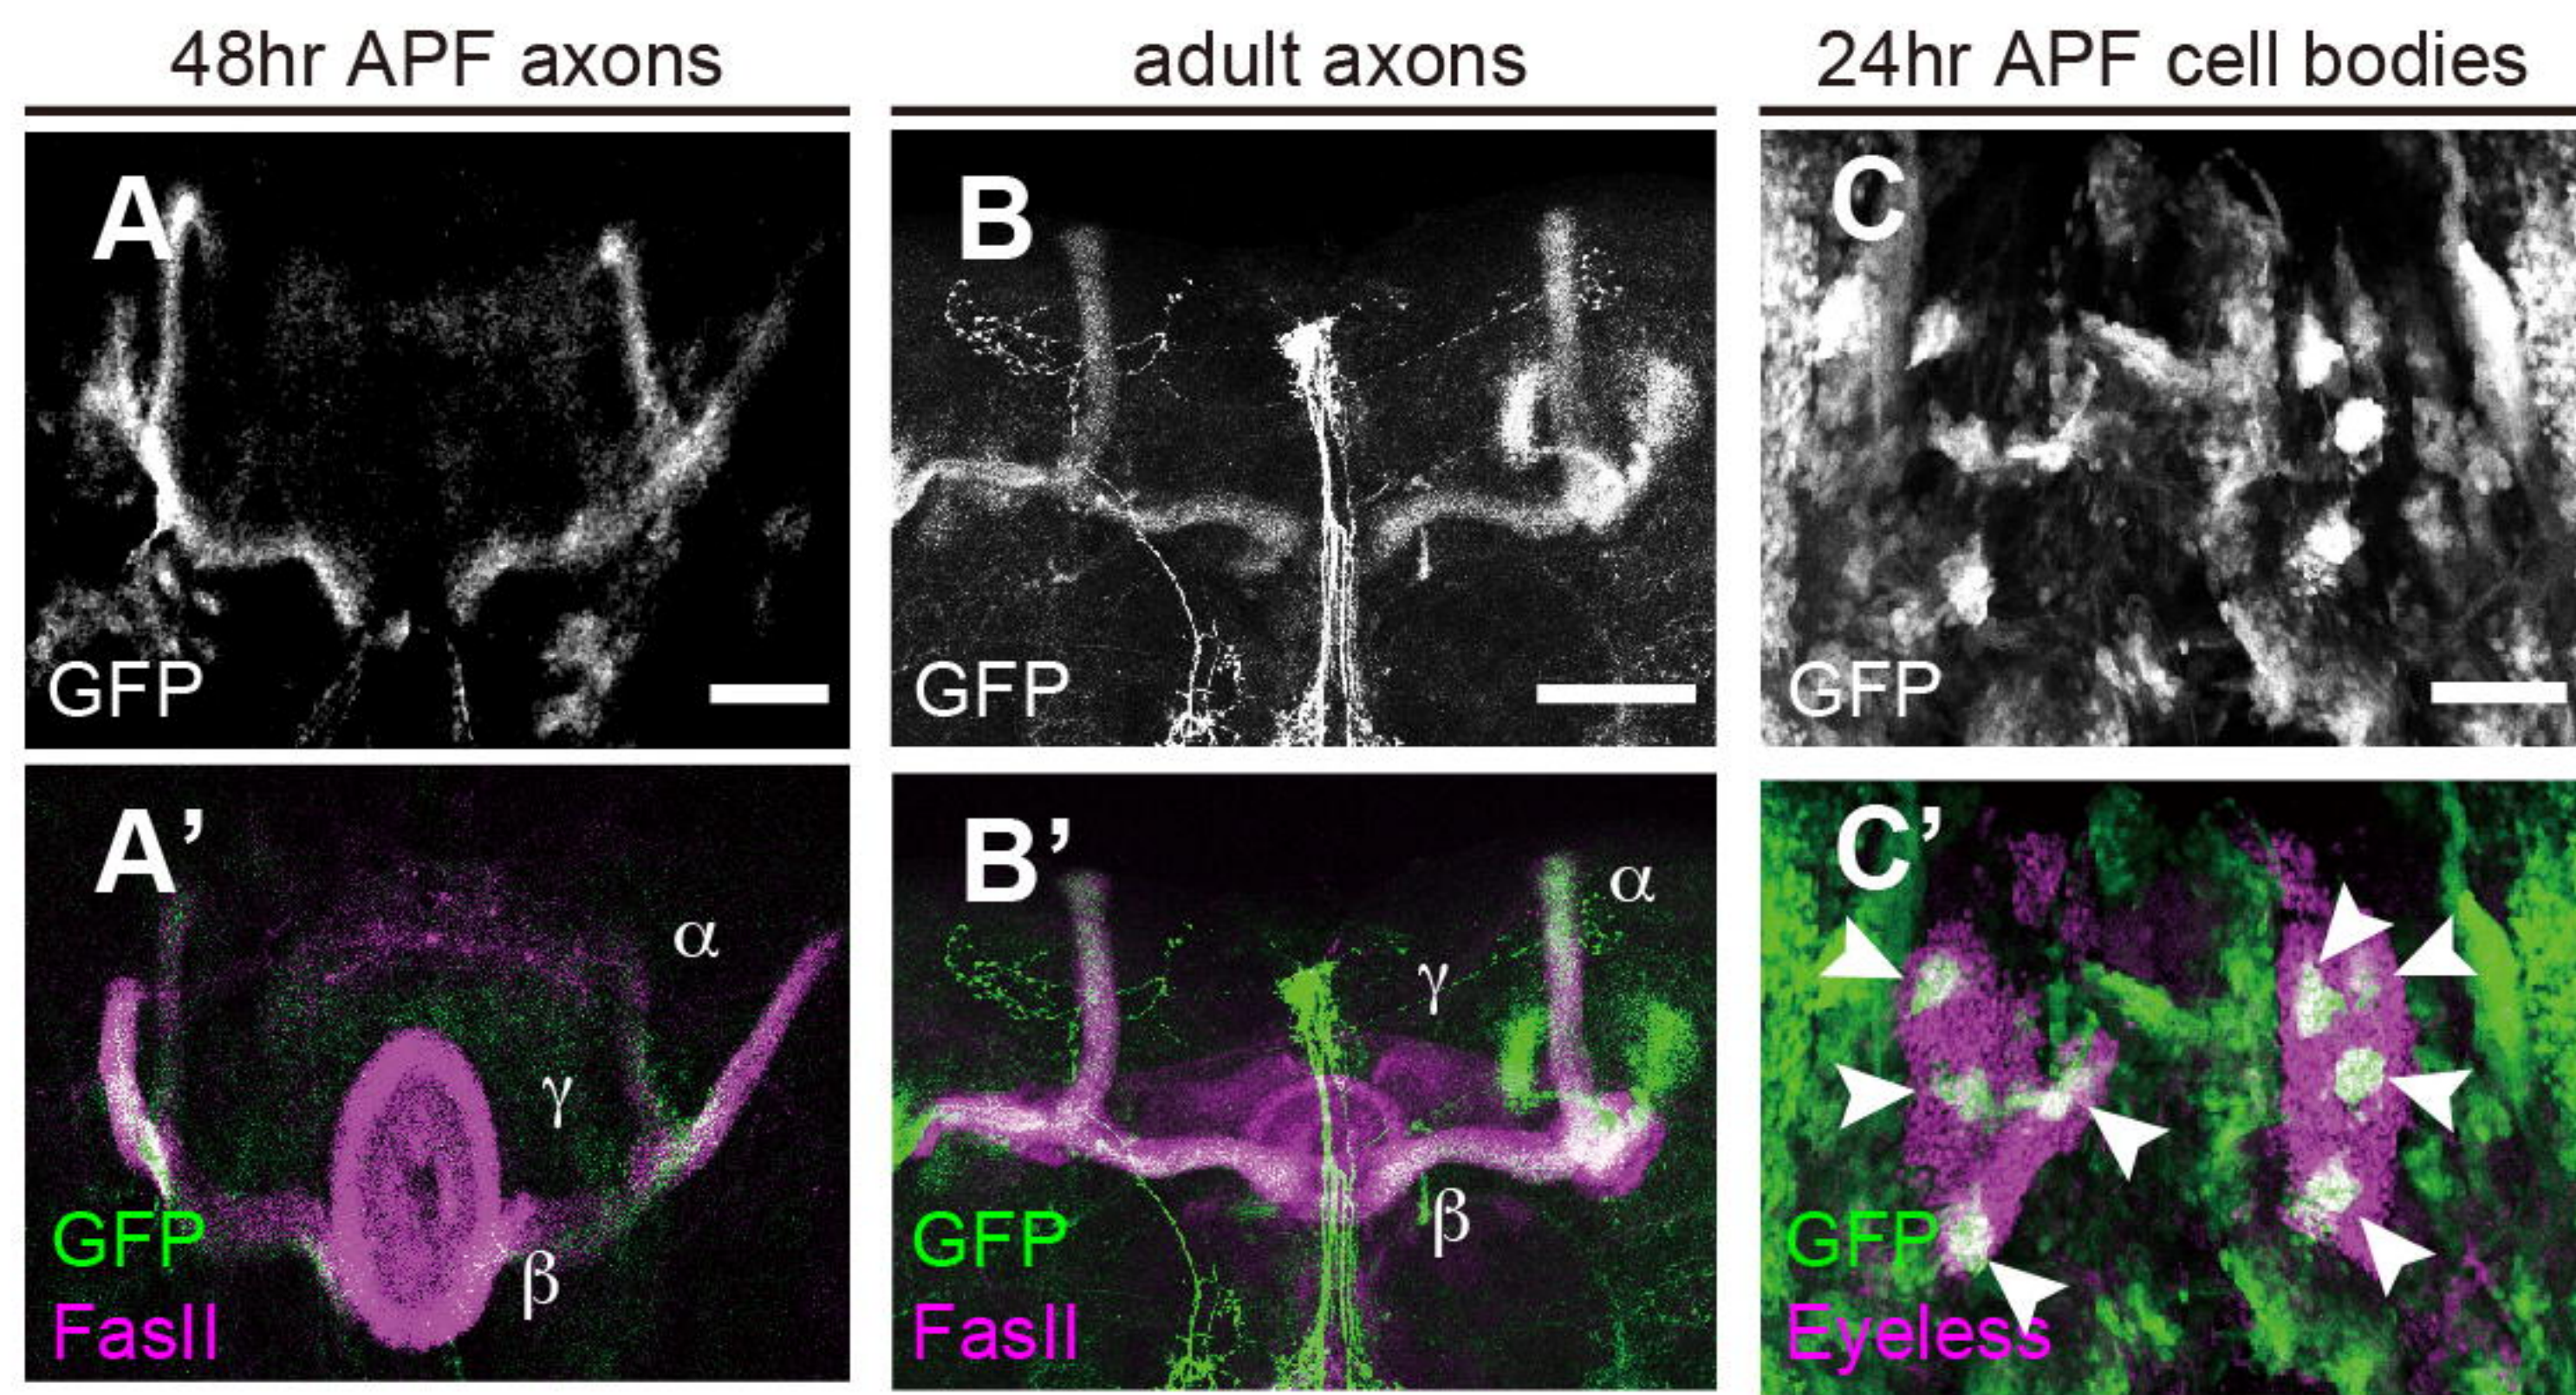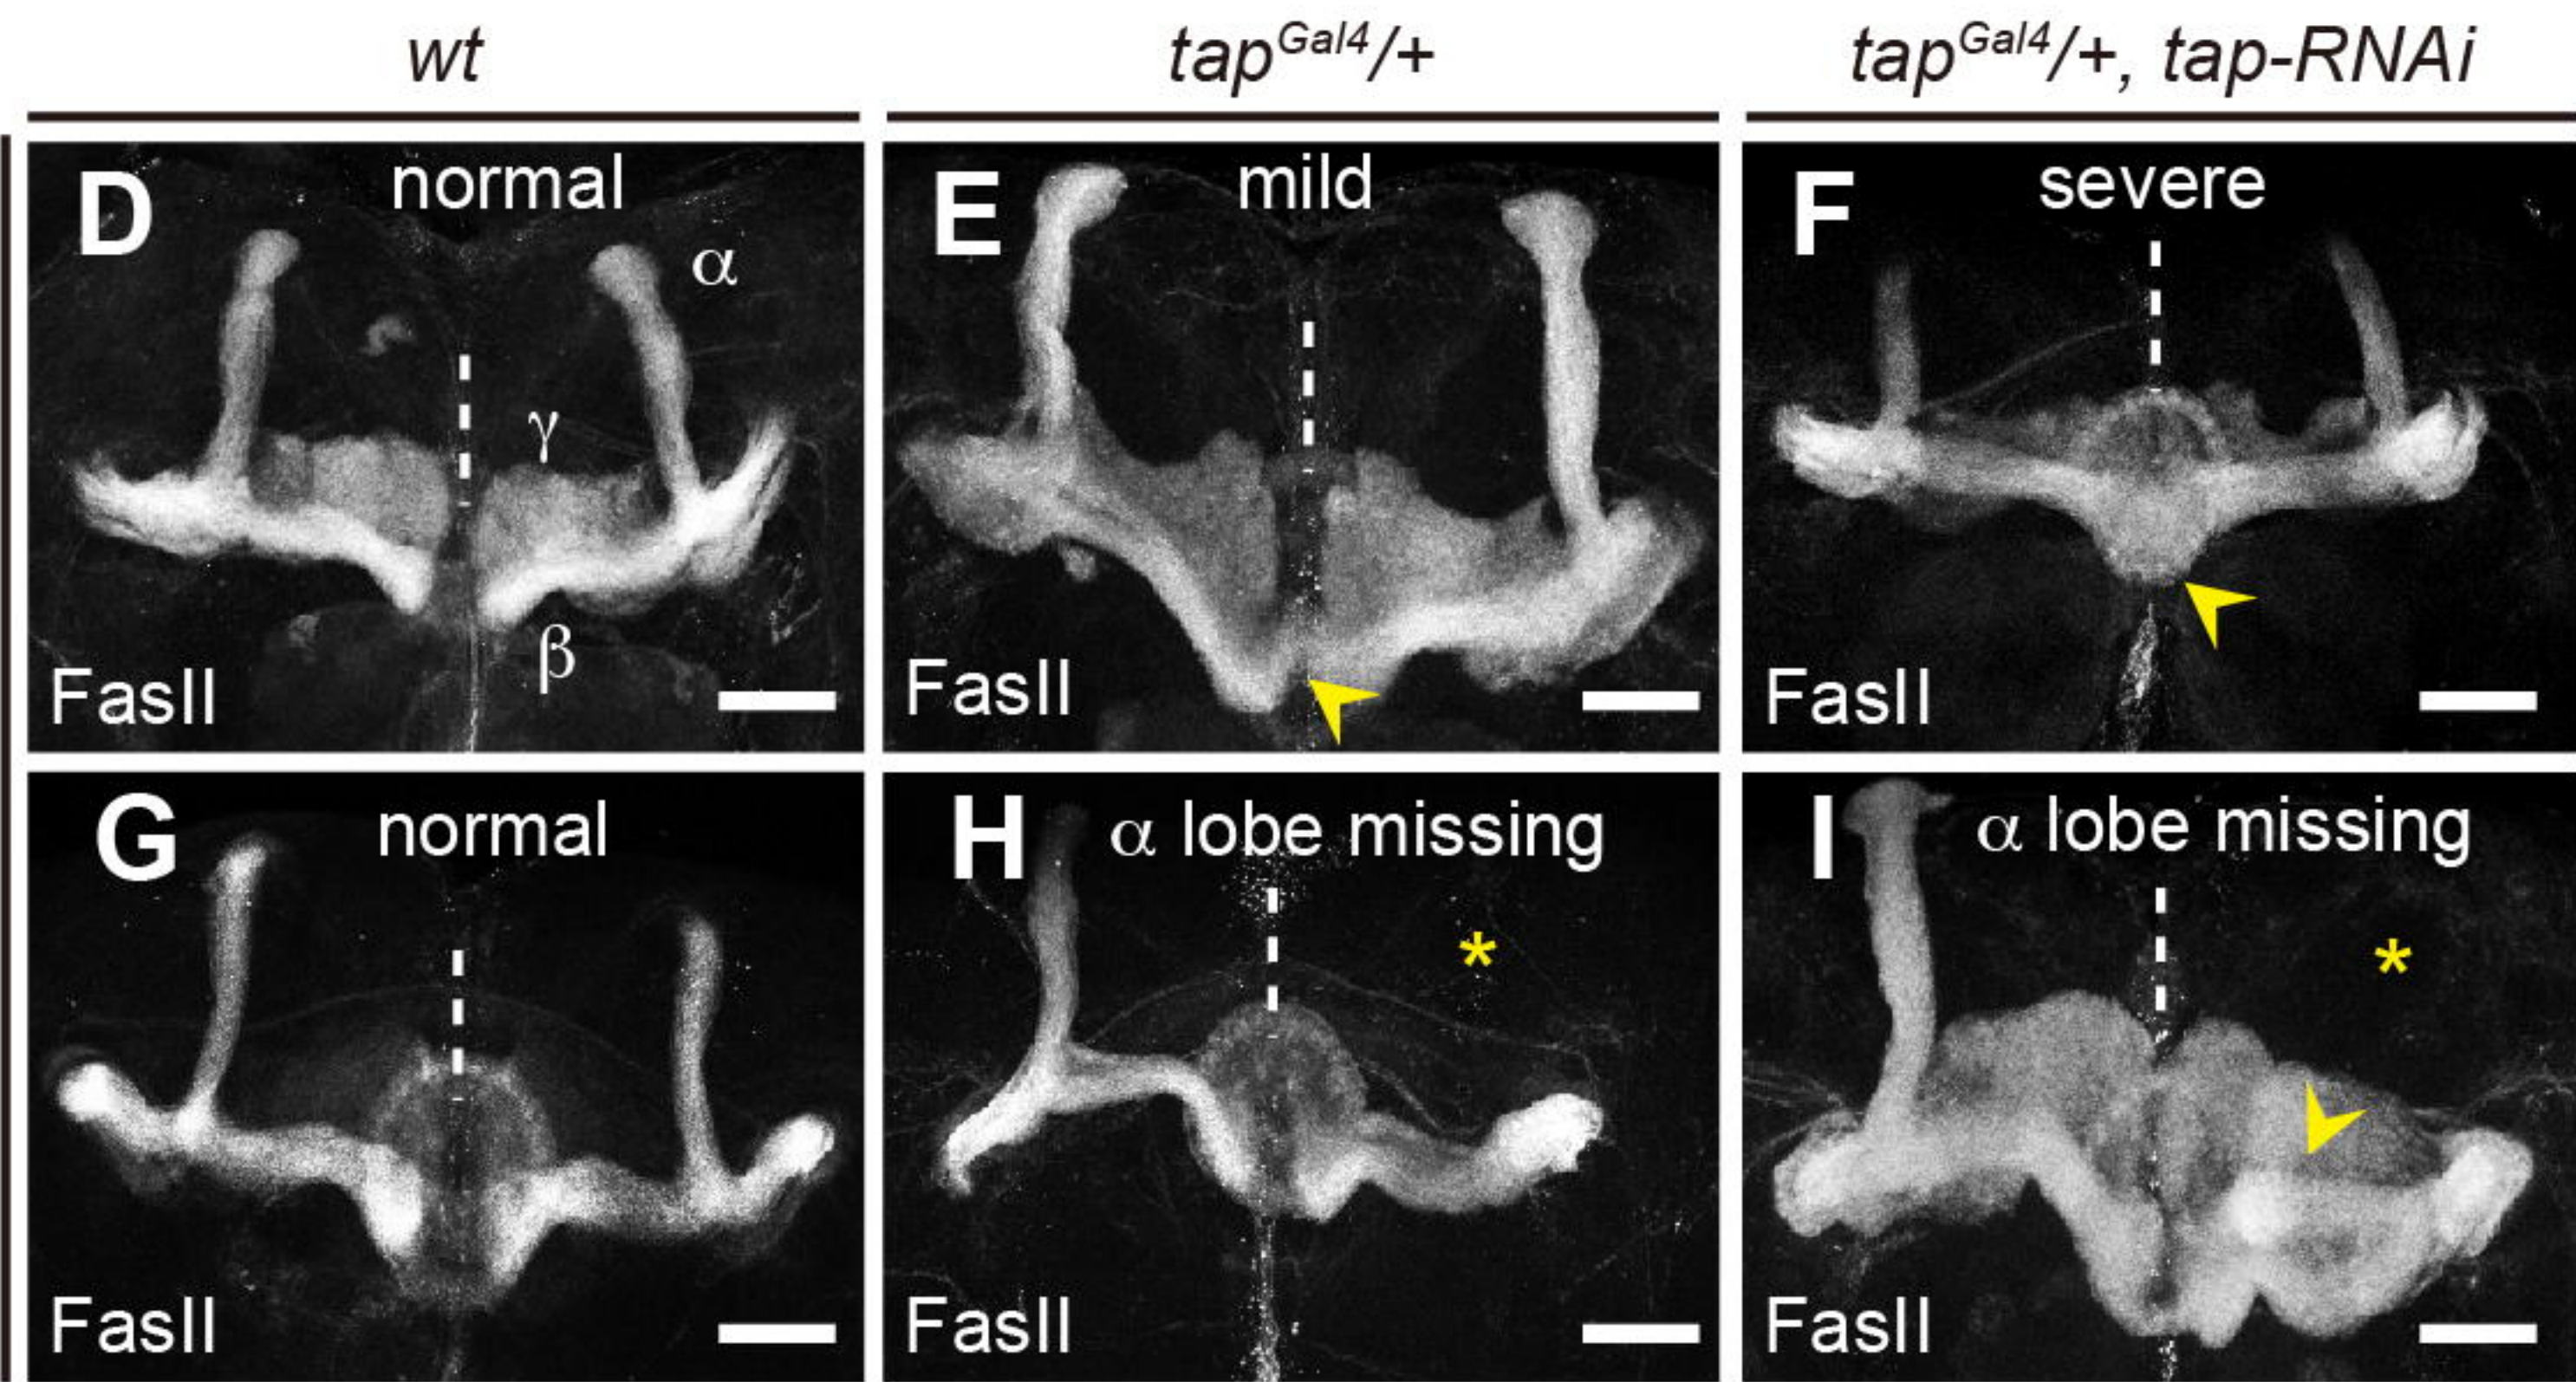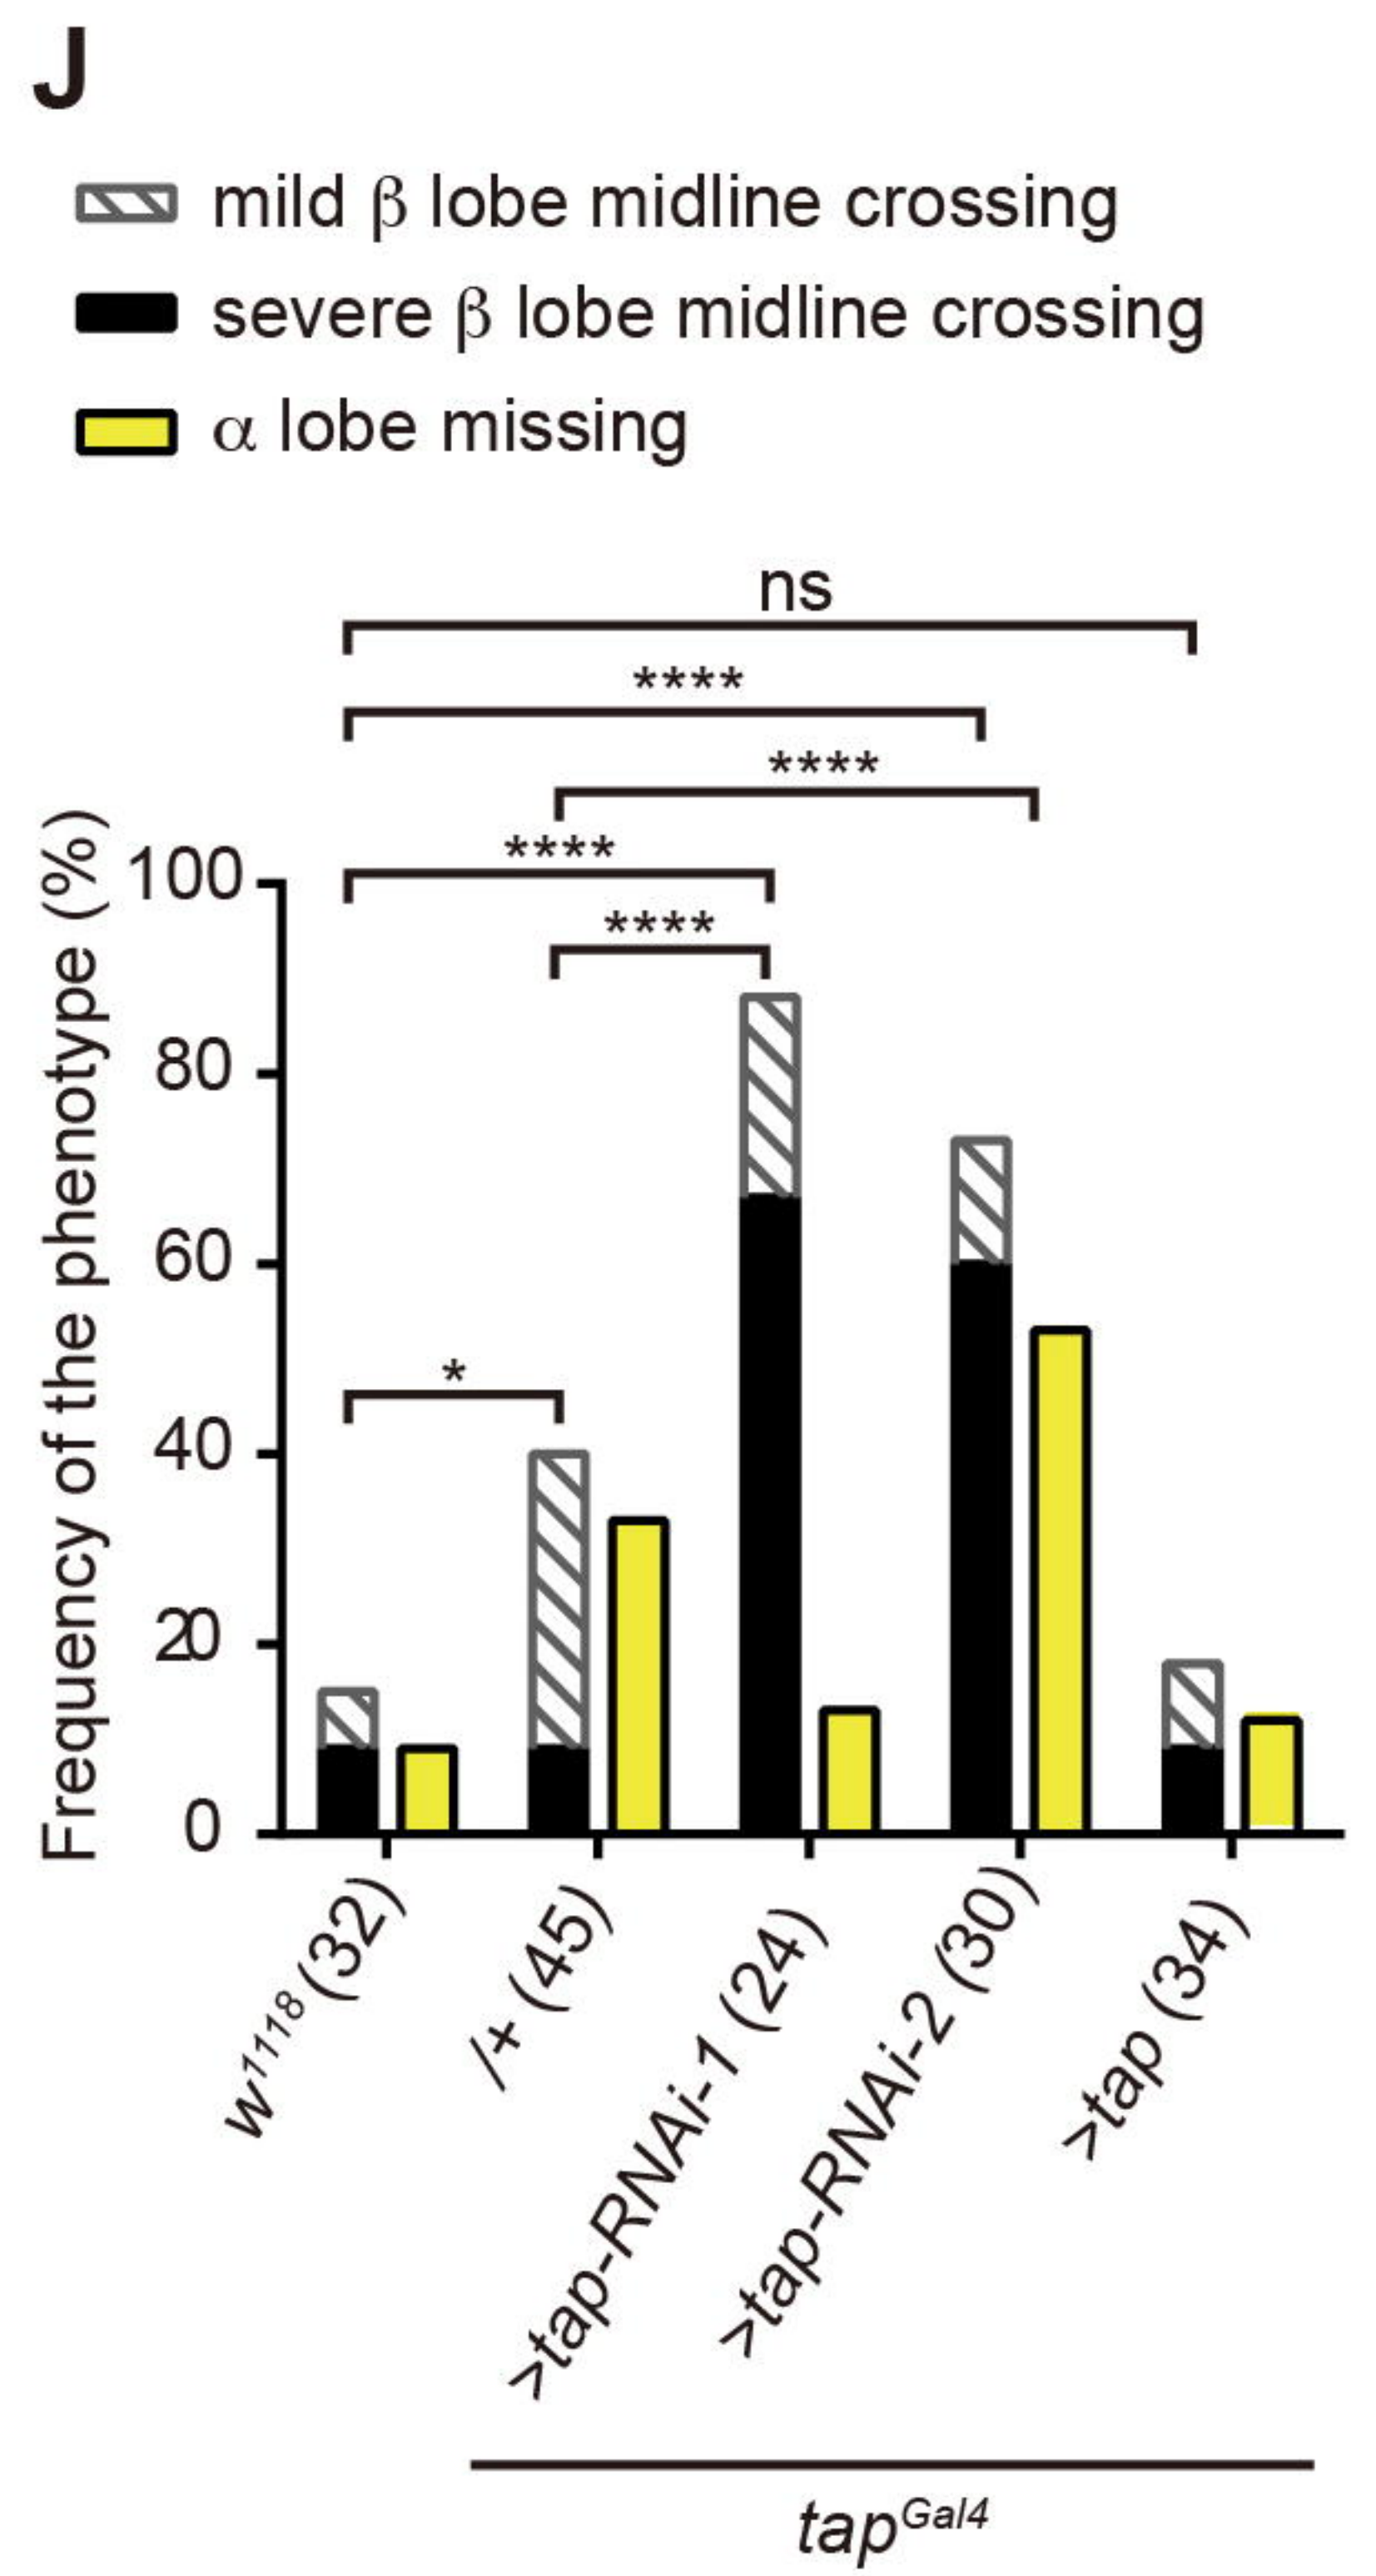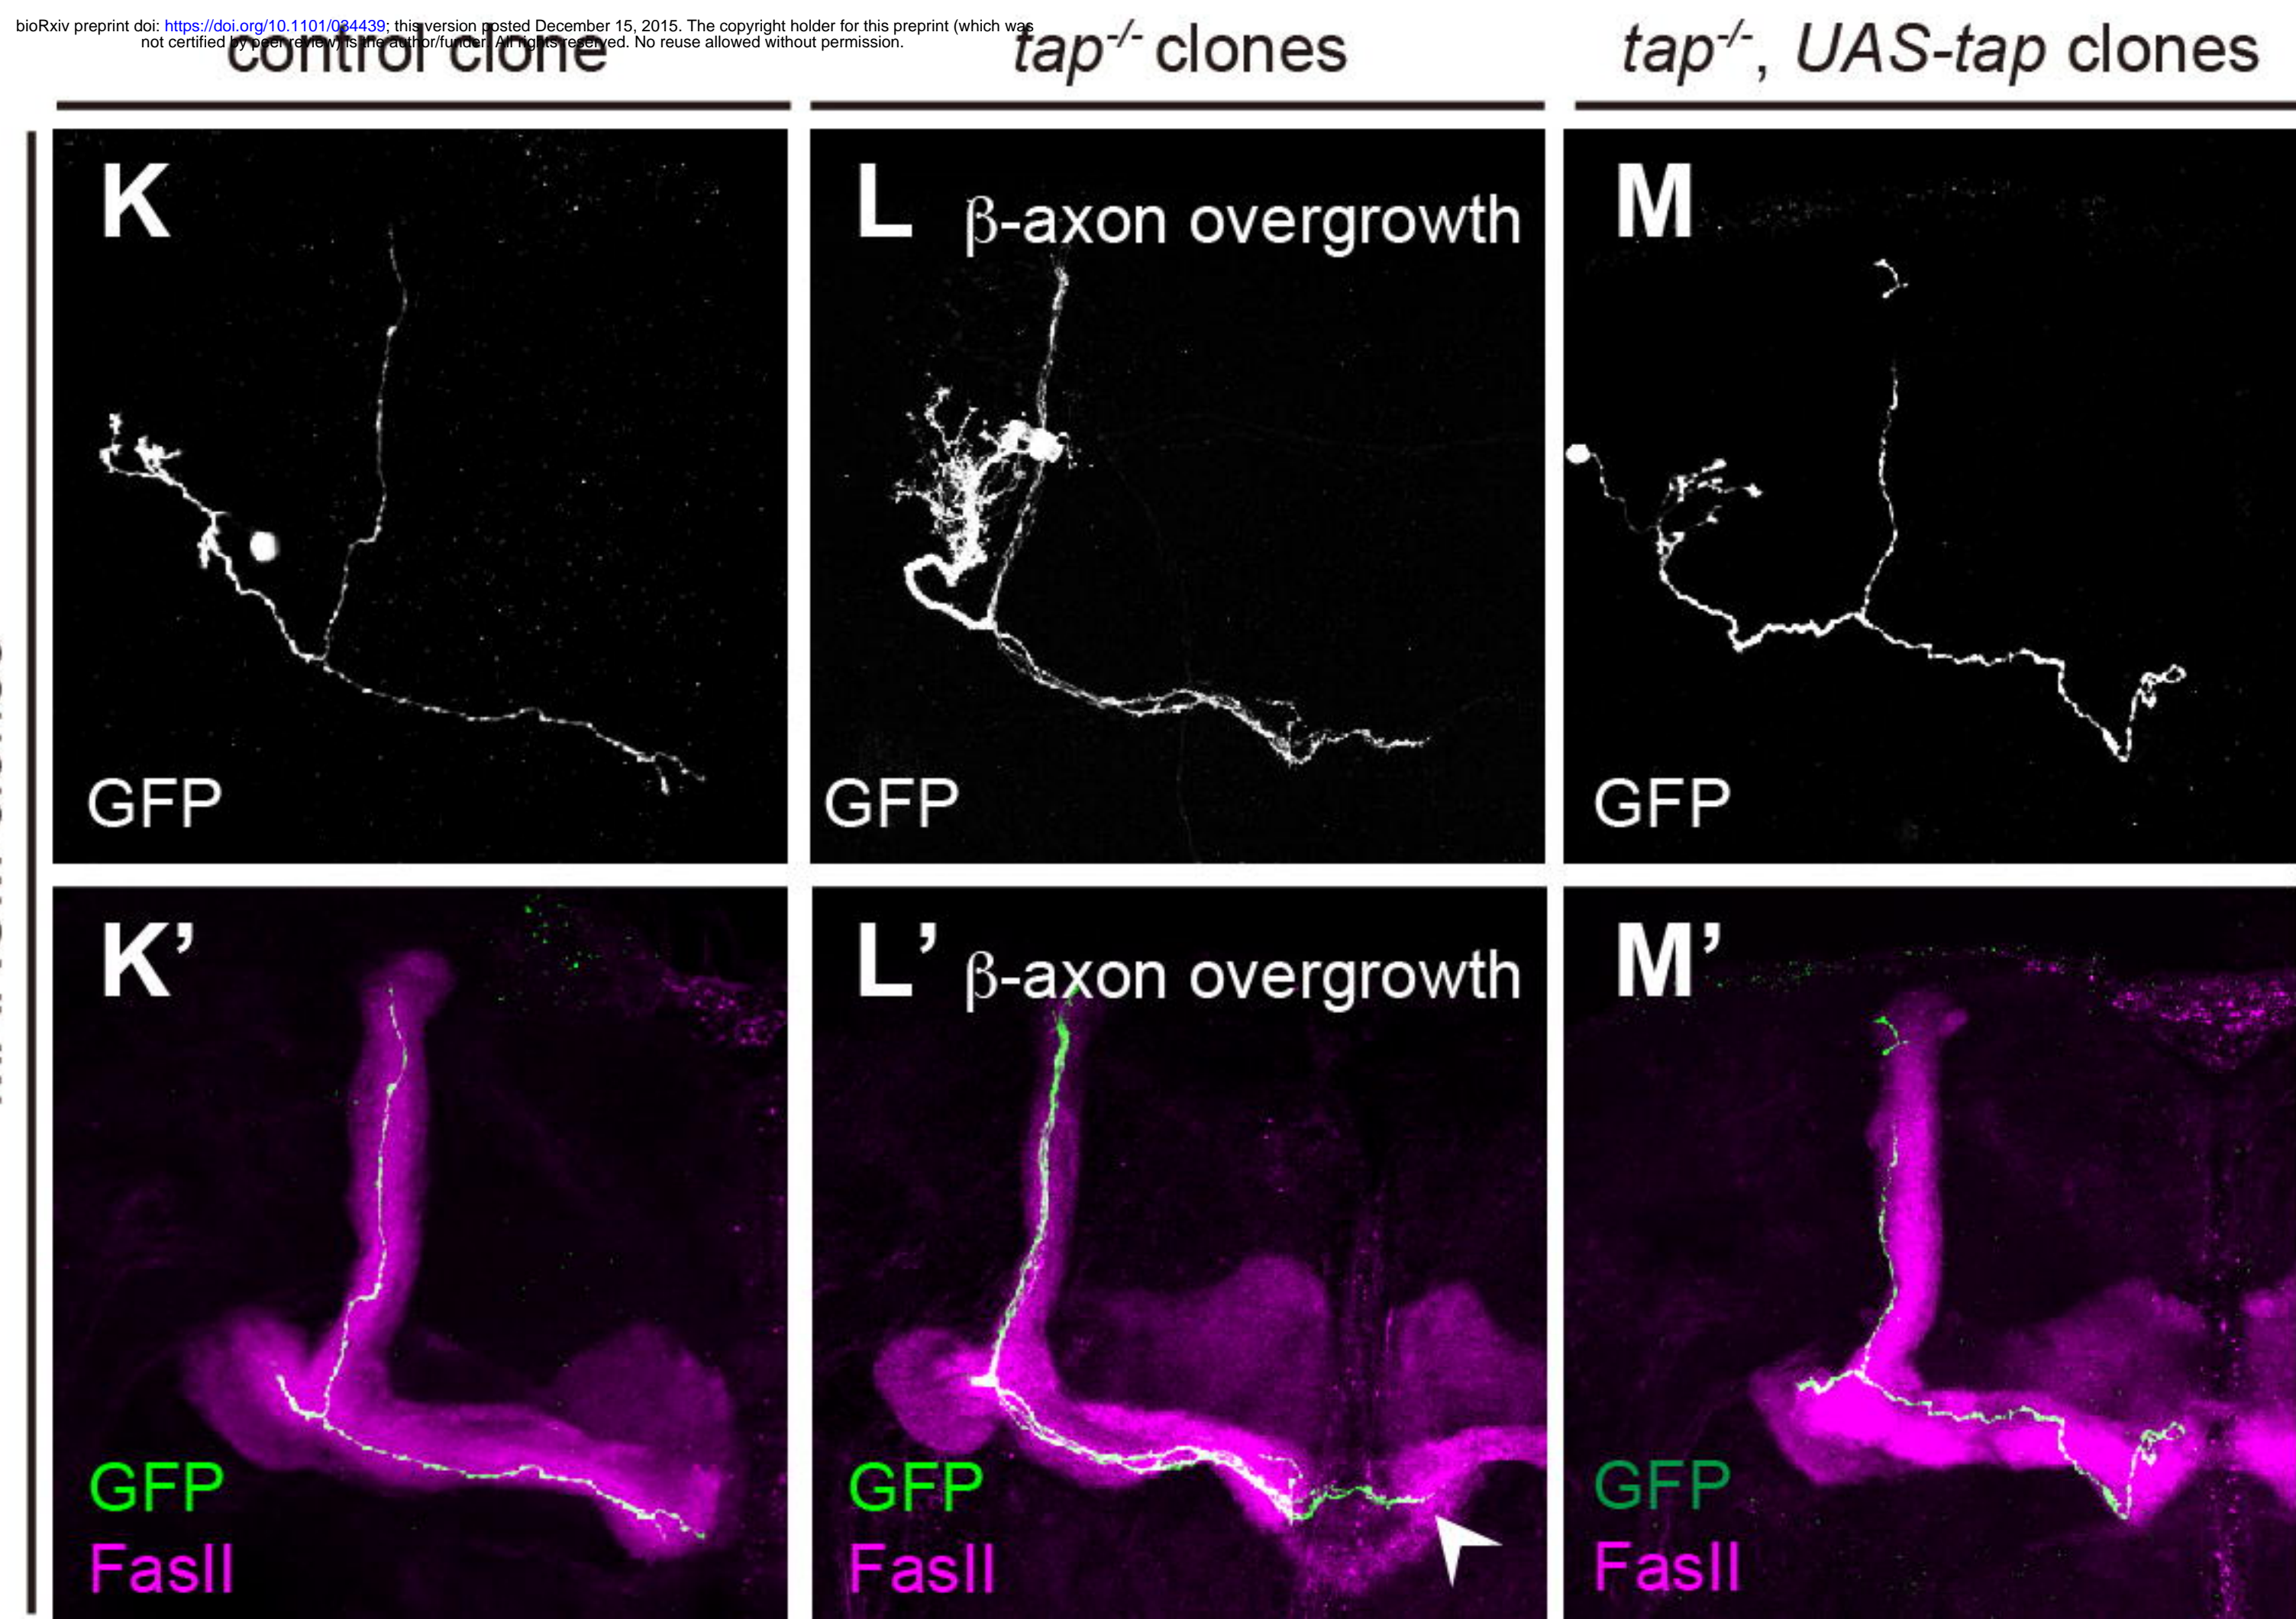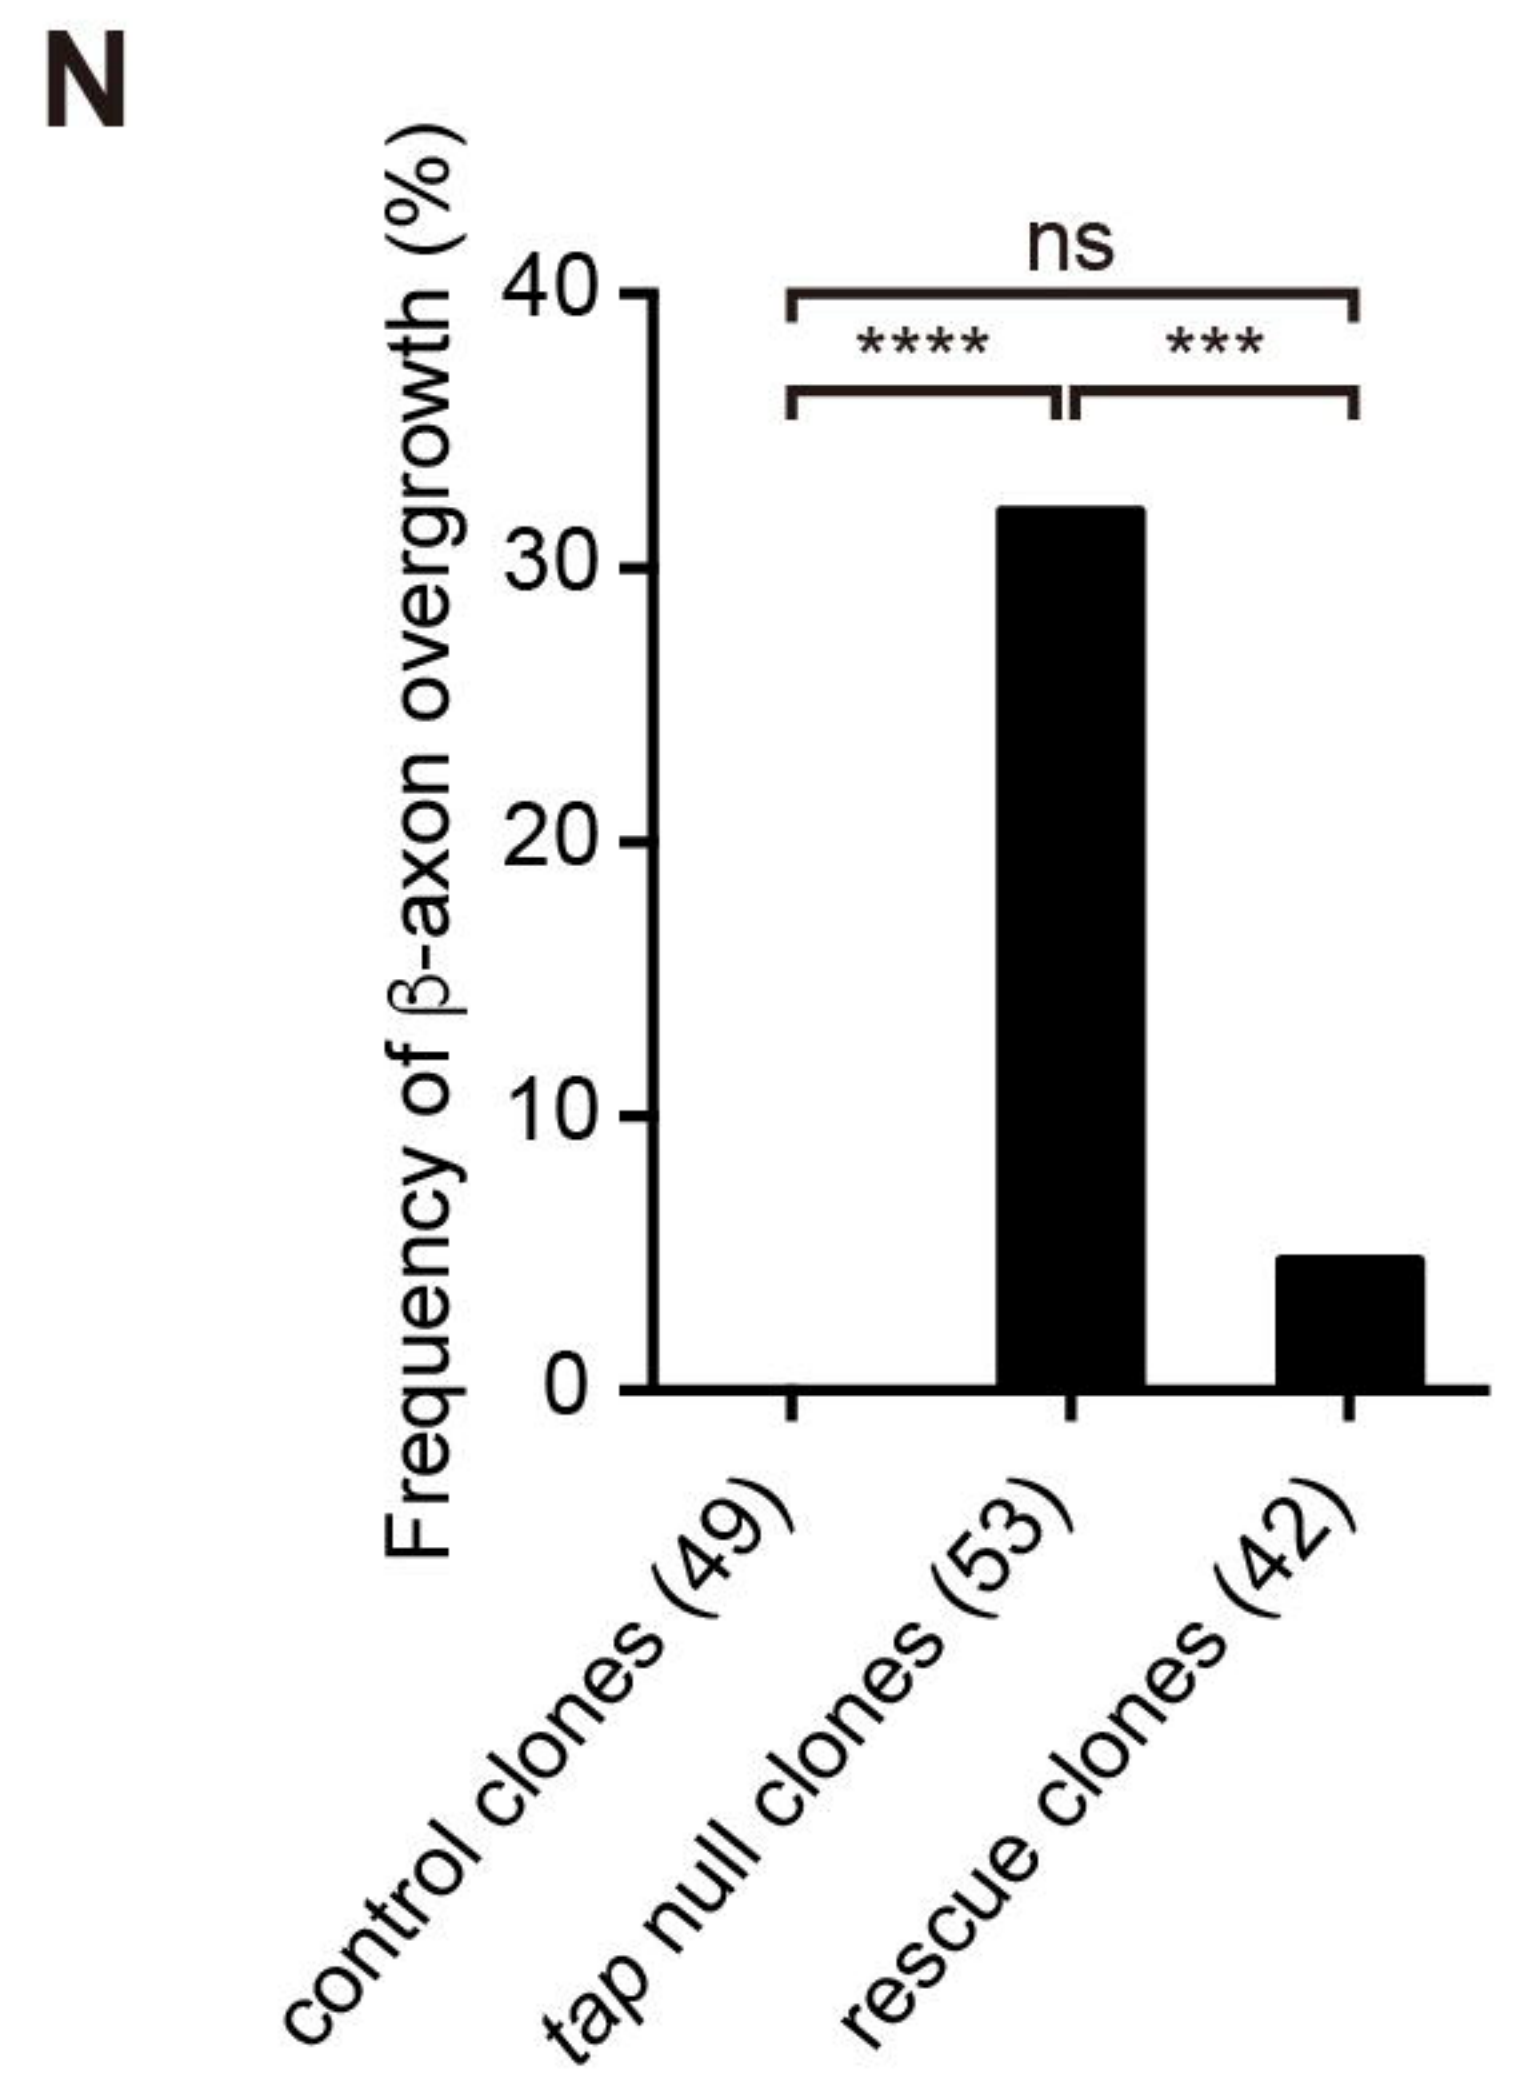



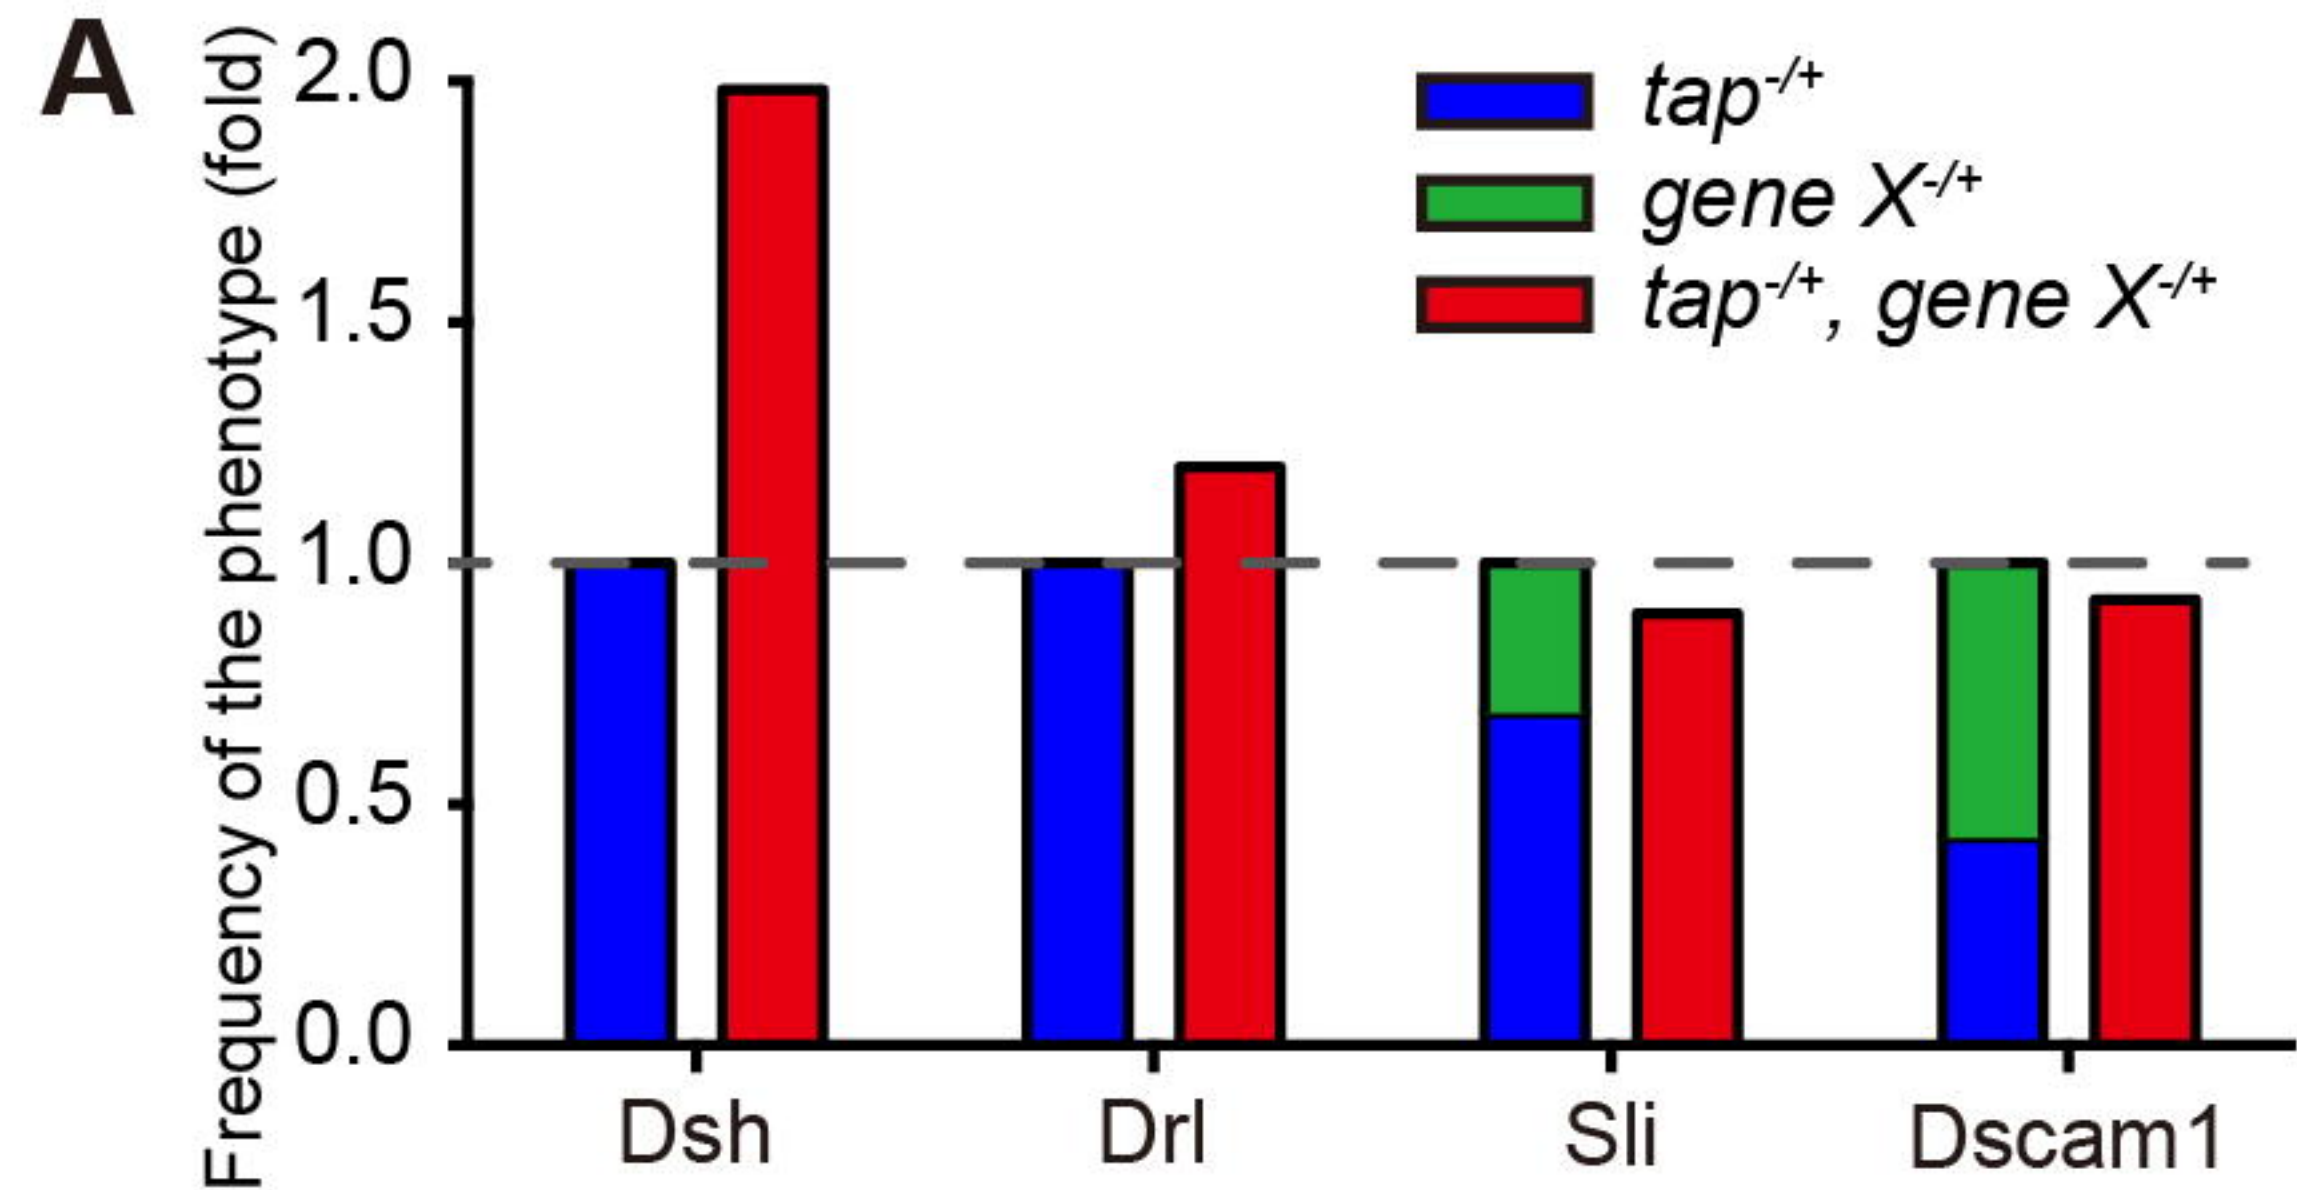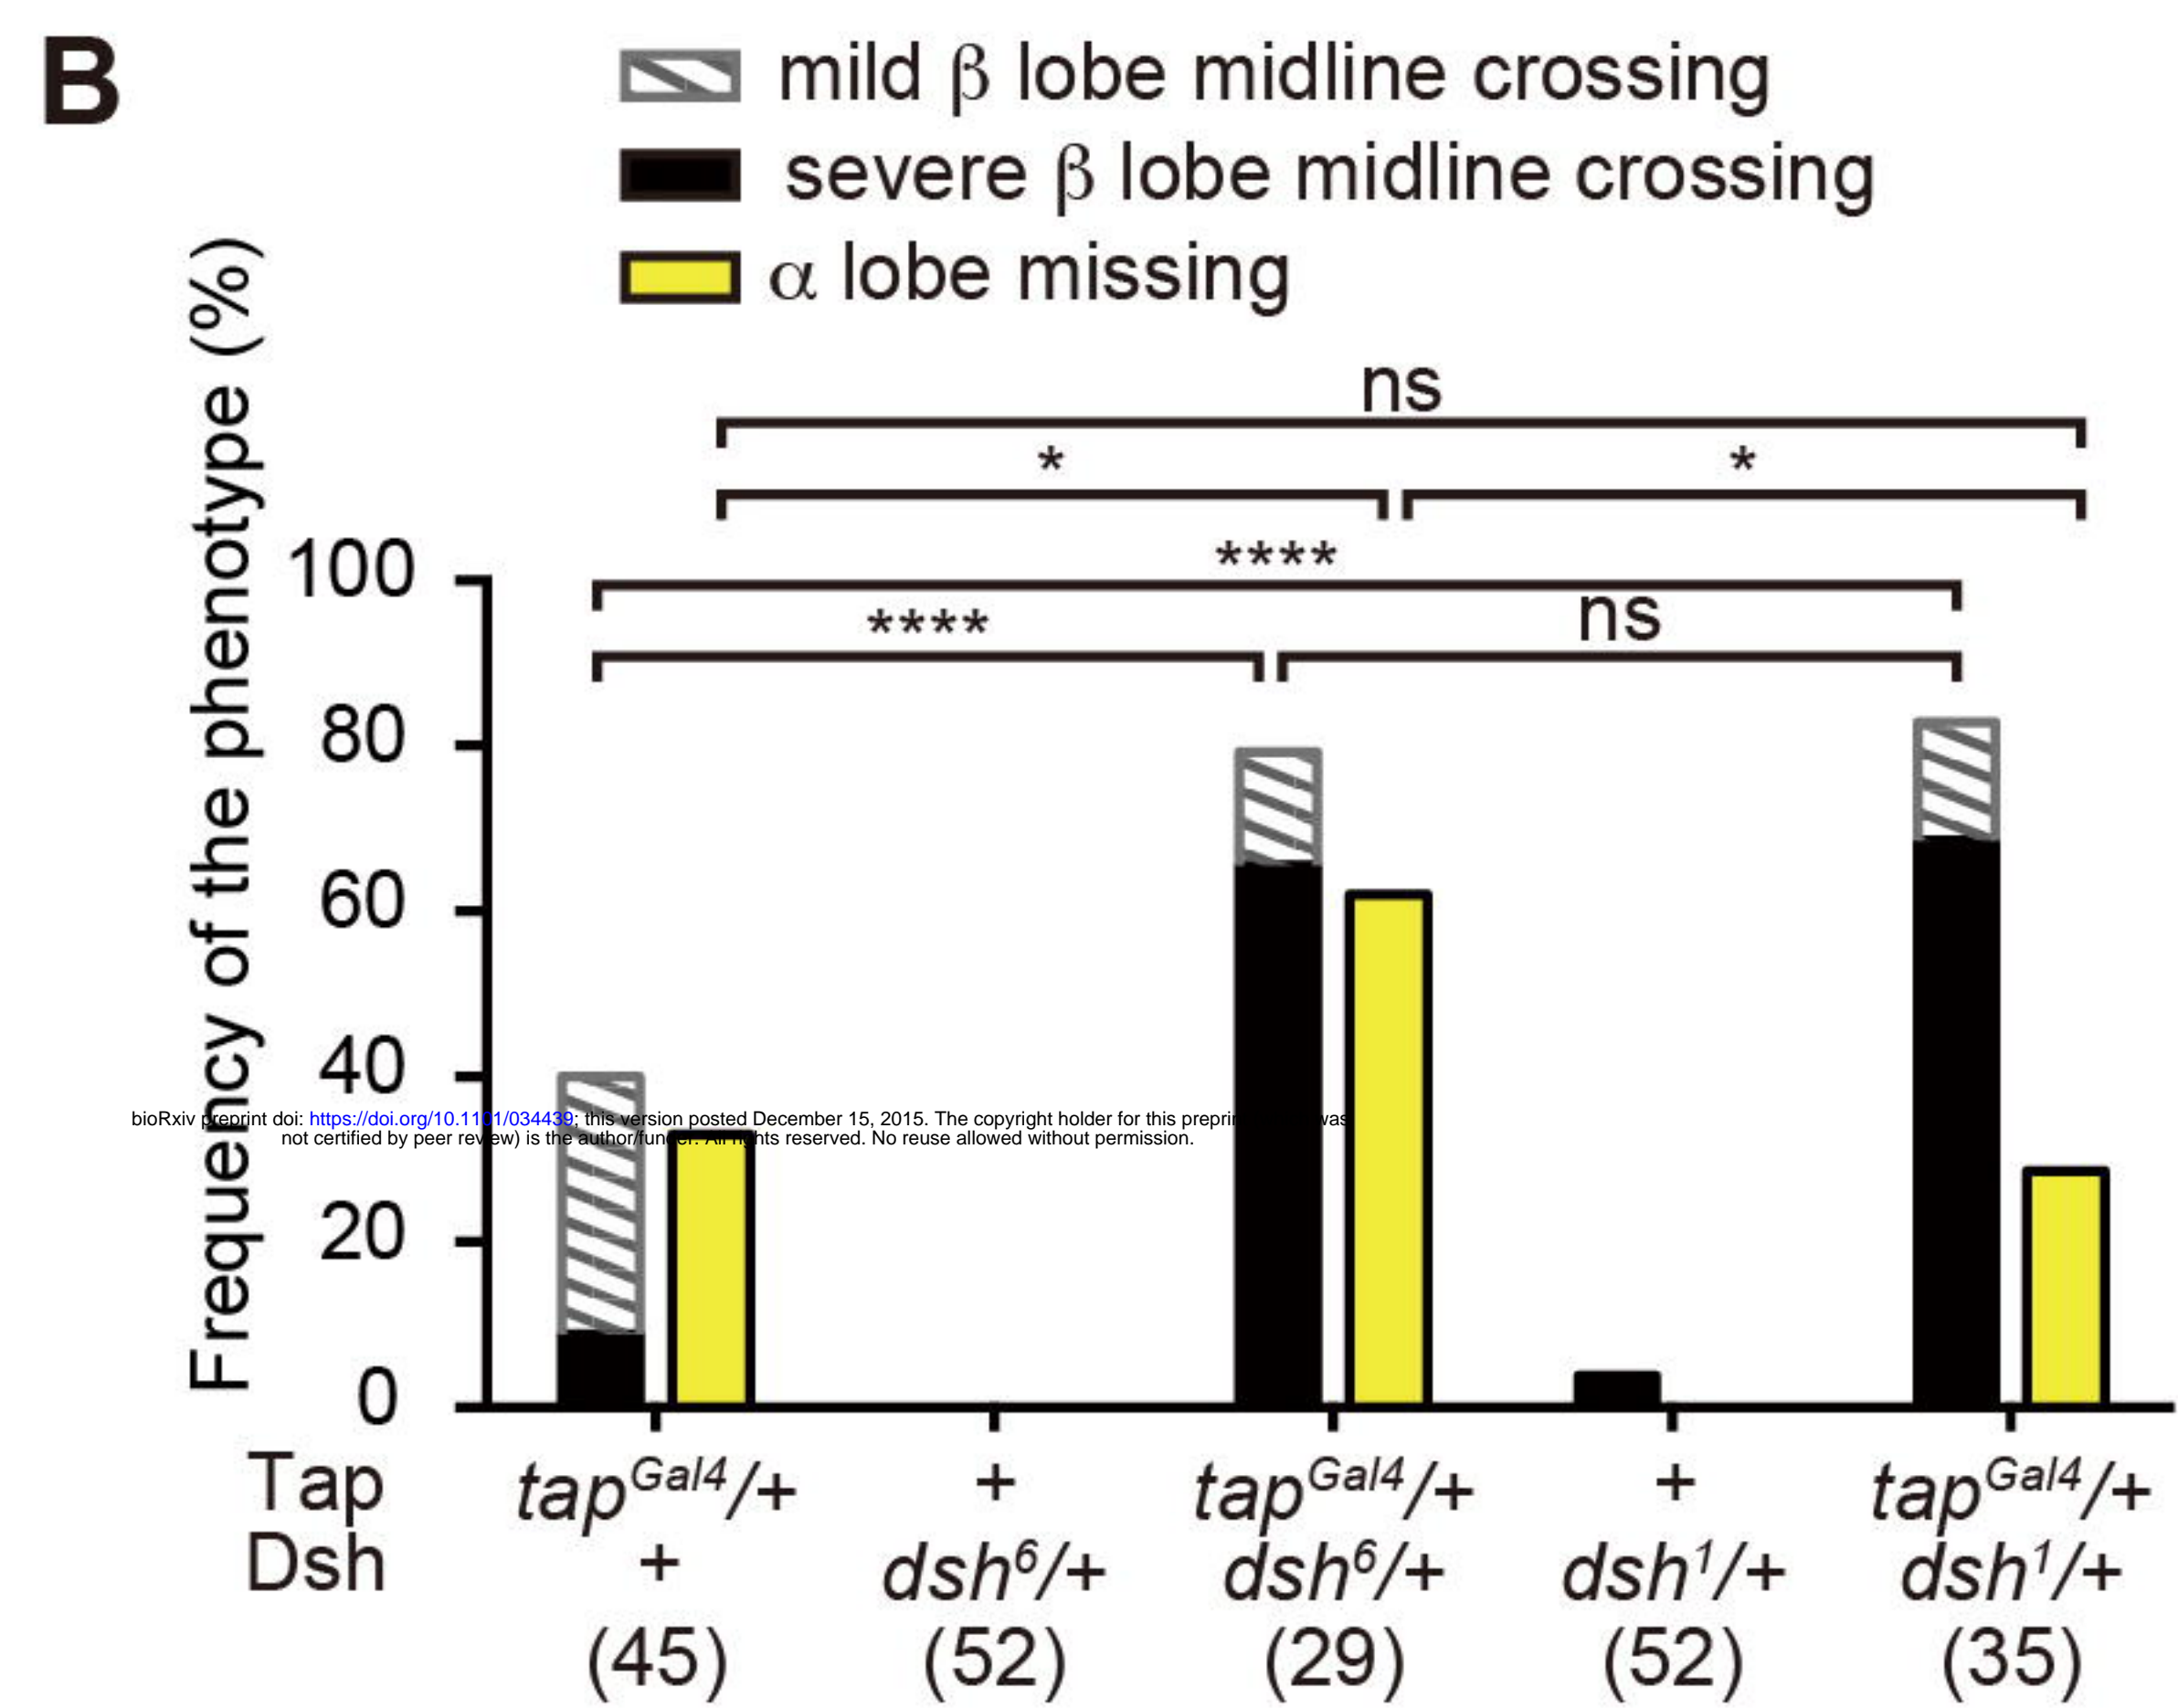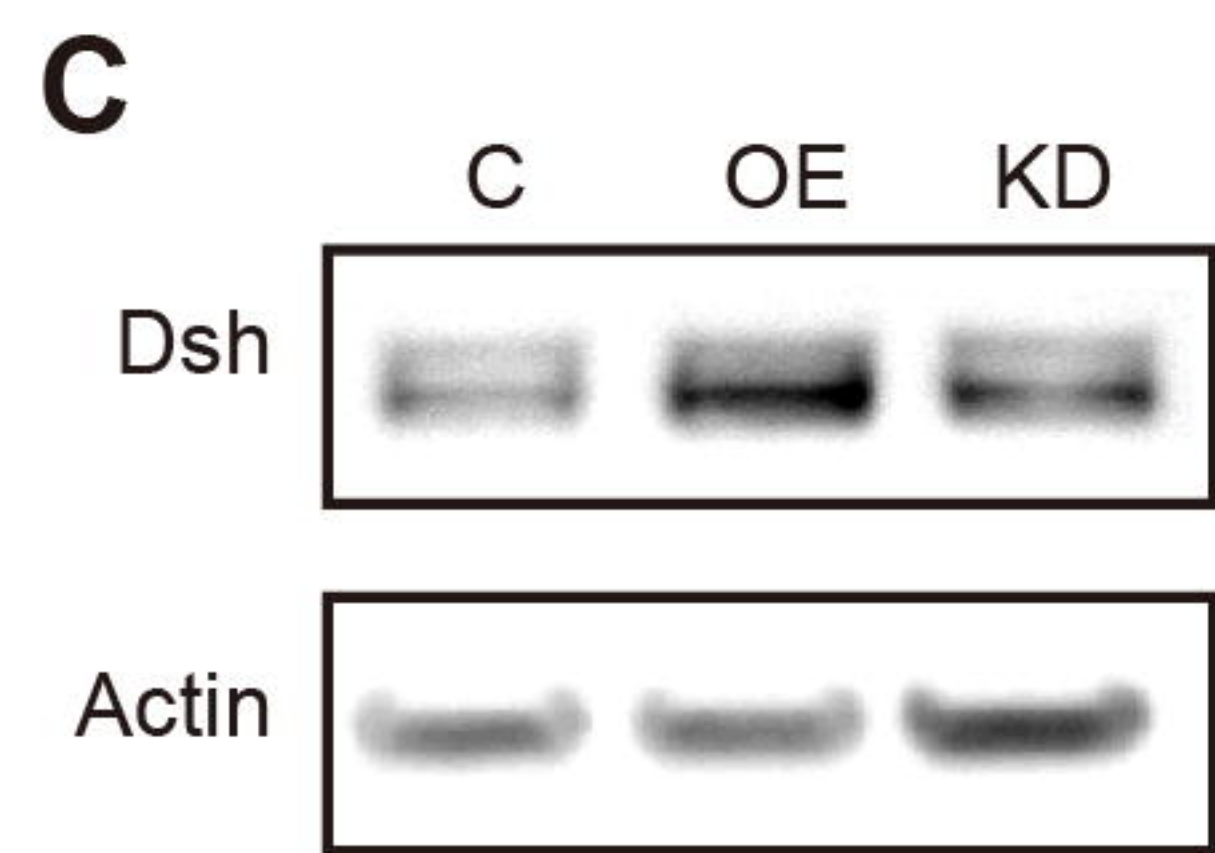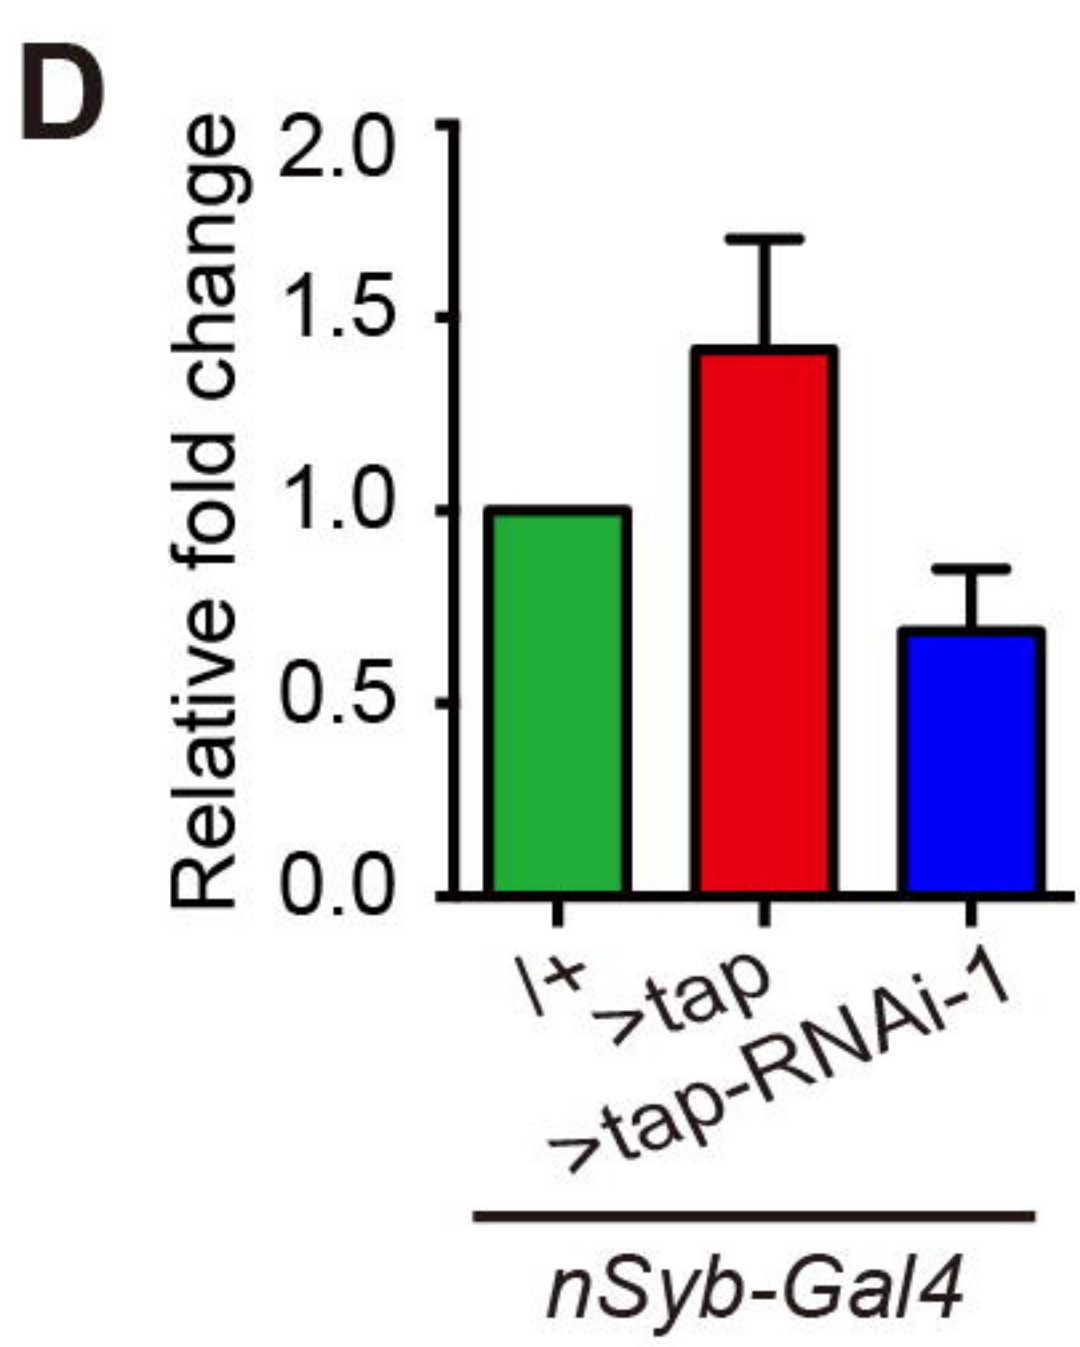

Source: http://biorxiv.org/content/10.1101/034439v1.full.pdf
